# Supplementary material for: Synthesis of 5,6-Dihydropyrazolo[5,1-a]isoquinolines through Tandem Reaction of C,N-Cyclic Azomethine Imines with α,β-Unsaturated Ketones
Source: MDPI journal article supplement (doi:10.3390/molecules28093710), 2023-04-25

## Supporting Information

### **Synthesis of 5,6-Dihydropyrazolo[5,1-a]isoquinolines through Tandem Reaction of C,N-Cyclic Azomethine Imines with $\alpha,\beta$ -Unsaturated Ketones**

**Young Jae Yun and Sung-Gon Kim \***

Department of Chemistry, Kyonggi University, 154-42, Gwanggyosan-ro, Yeongtong-gu,  
Suwon 16227, Republic of Korea

\* Correspondence: sgkim123@kyonggi.ac.kr

**$^1\text{H}$  NMR (400 MHz) in  $\text{CDCl}_3$** 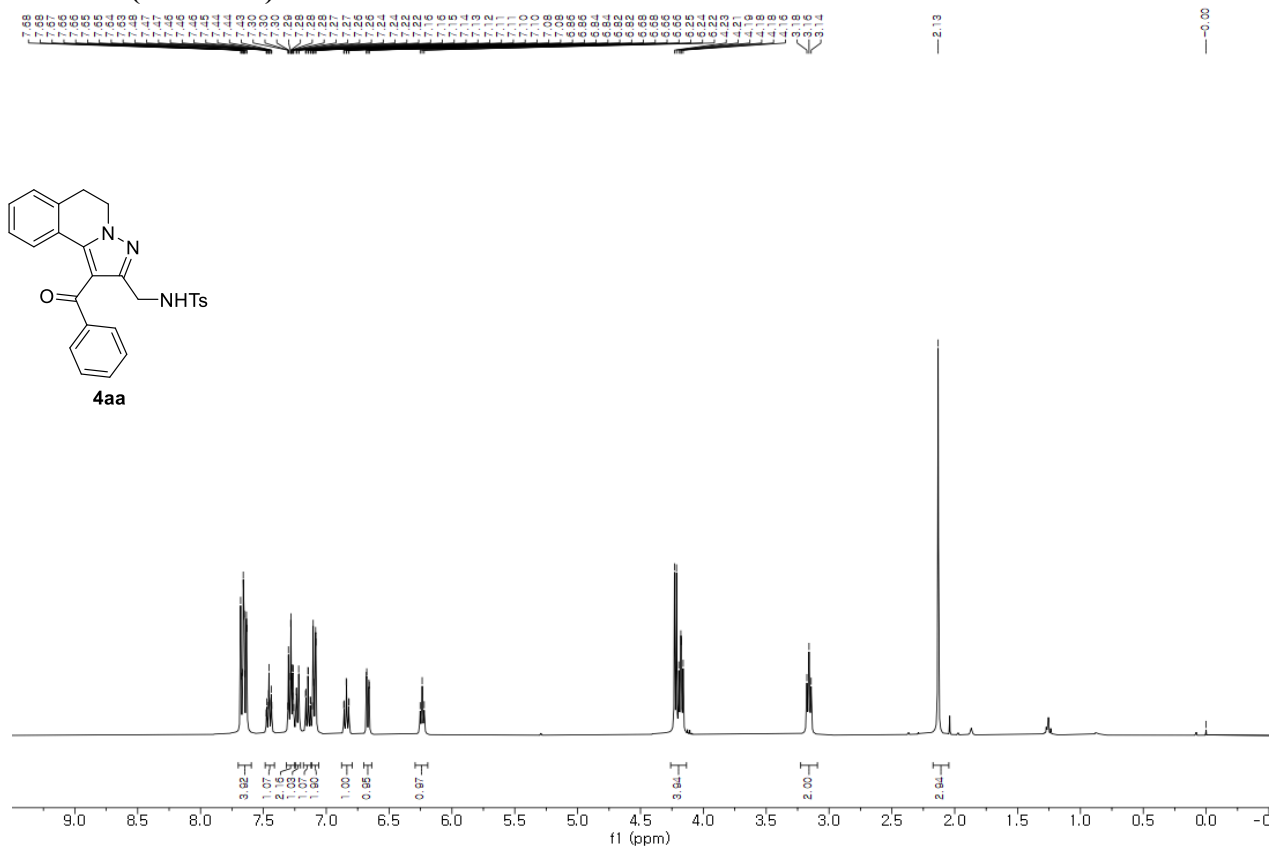 **$^{13}\text{C}$  NMR (100 MHz) in  $\text{CDCl}_3$** 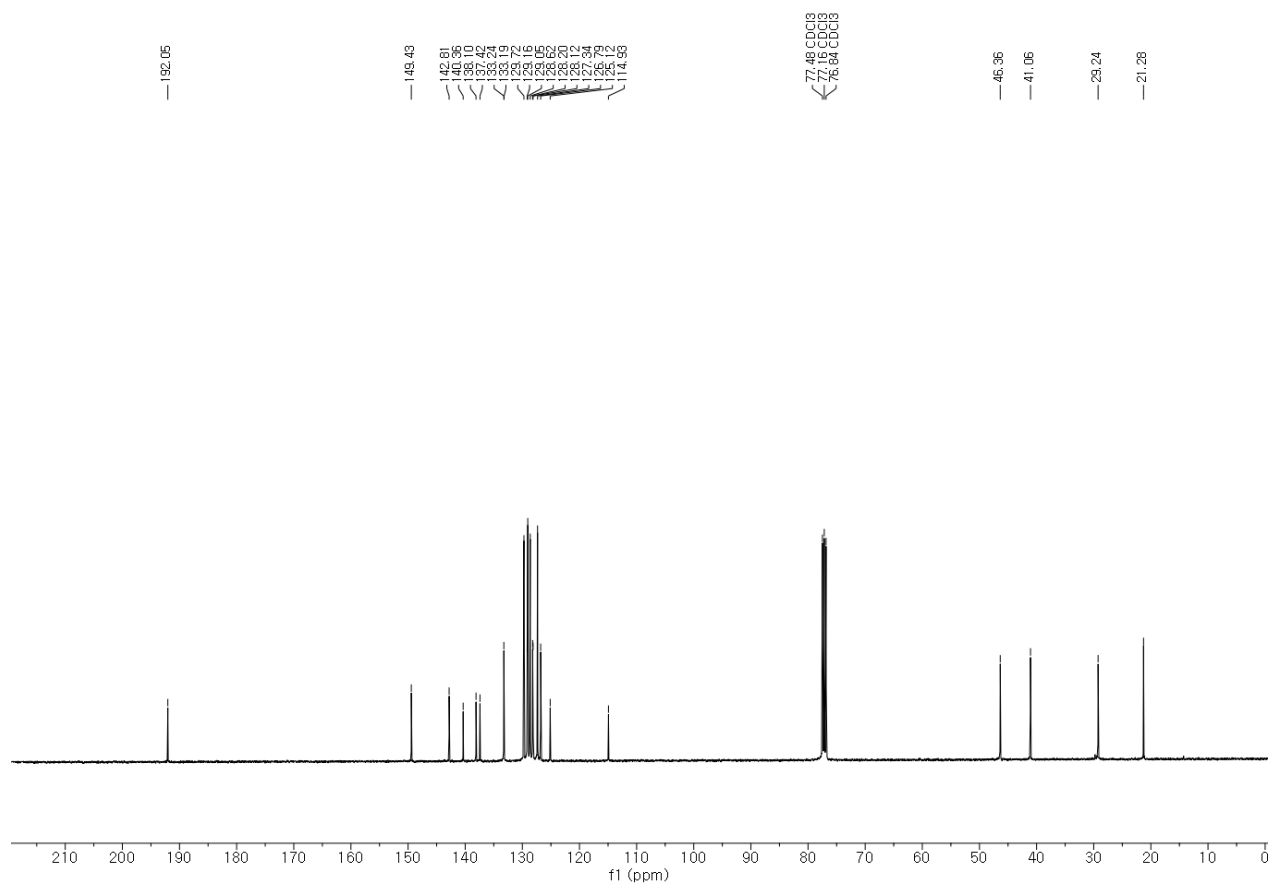

**<sup>1</sup>H NMR (400 MHz) in CDCl<sub>3</sub>**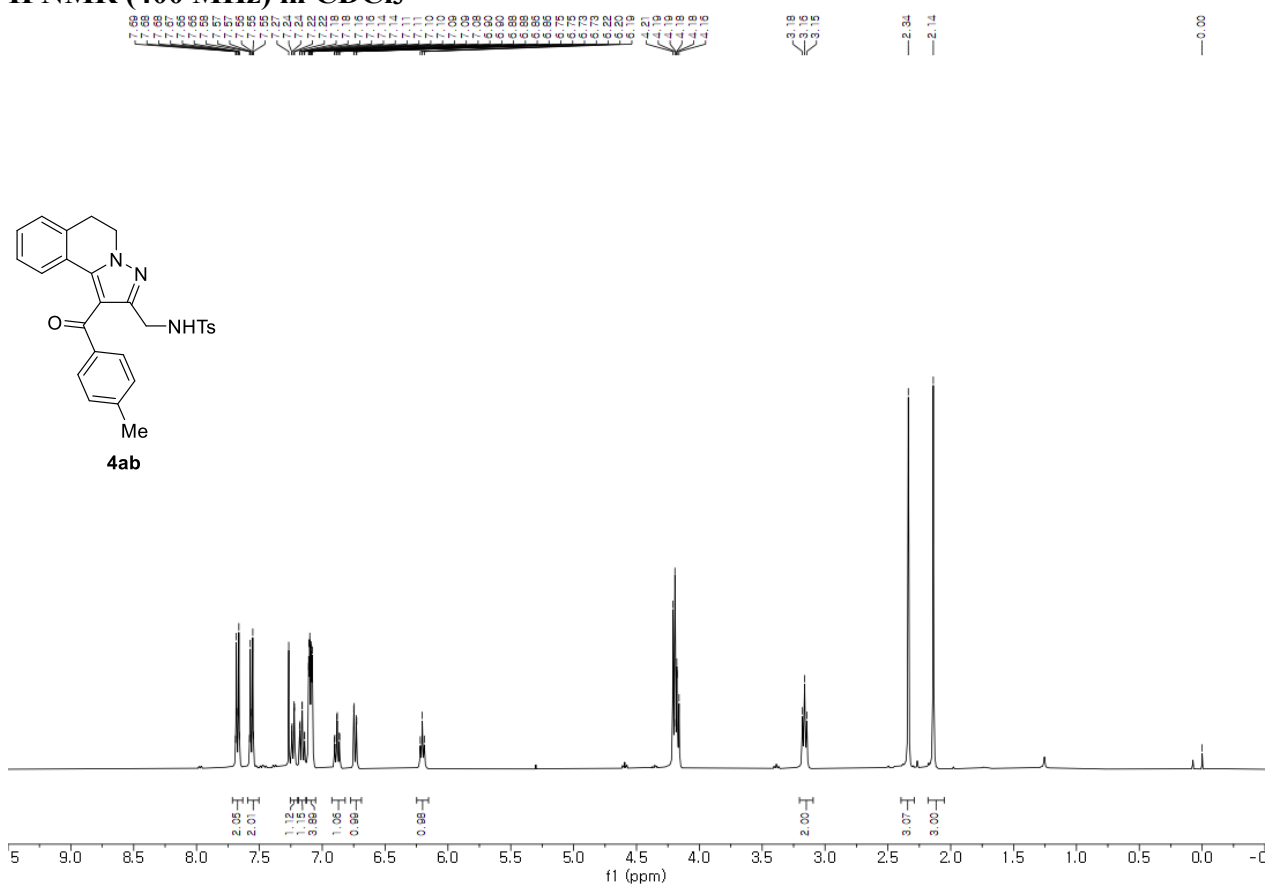**<sup>13</sup>C NMR (100 MHz) in CDCl<sub>3</sub>**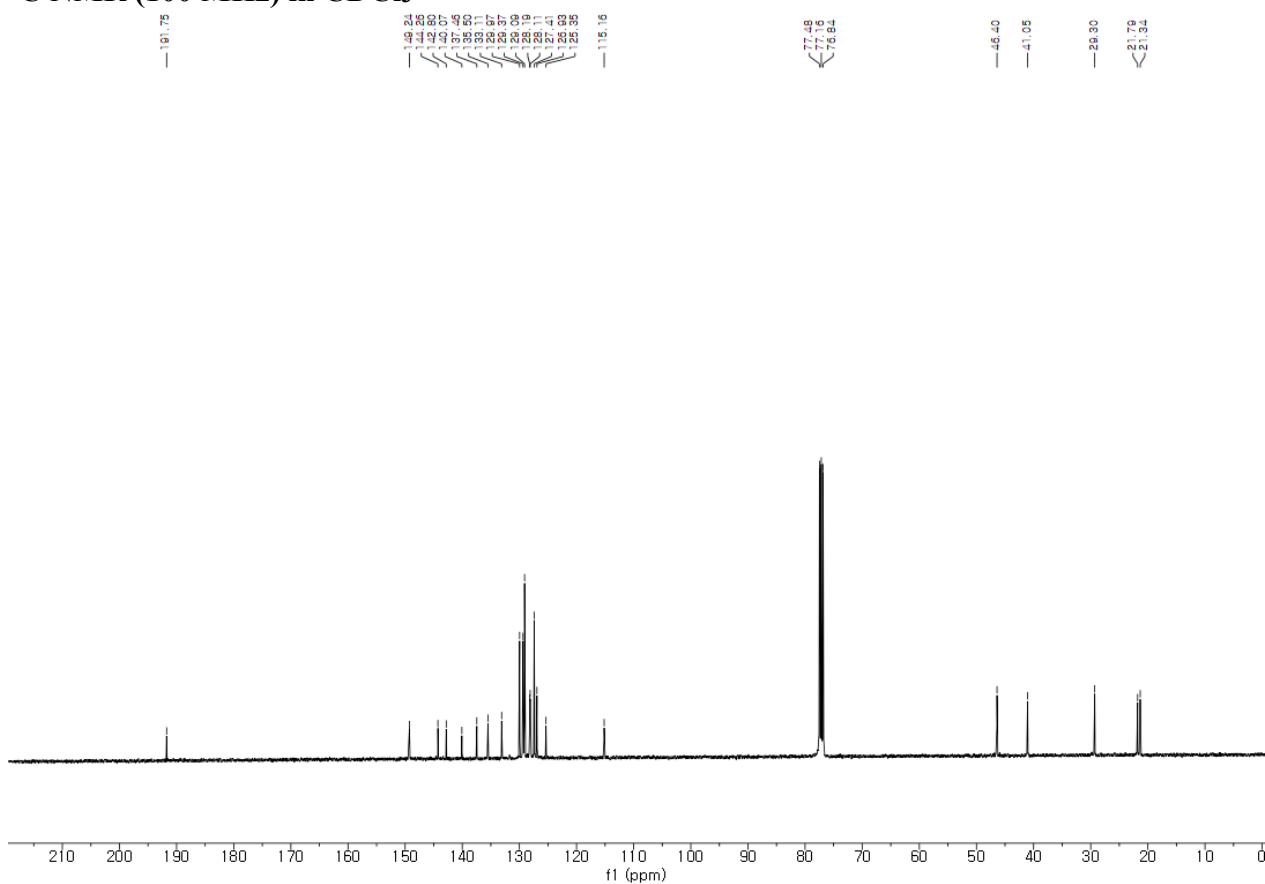

**<sup>1</sup>H NMR (400 MHz) in CDCl<sub>3</sub>**

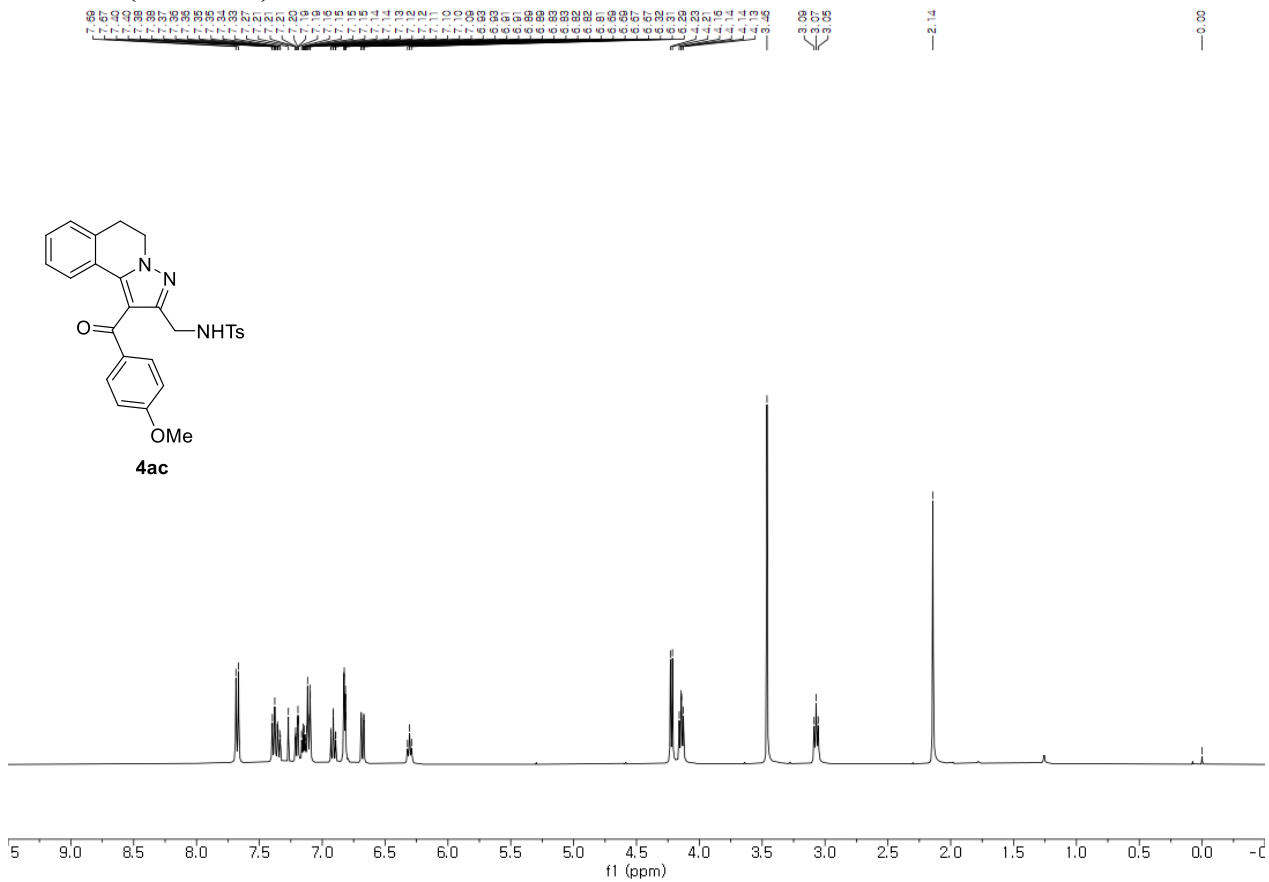

**$^{13}\text{C}$  NMR (100 MHz) in  $\text{CDCl}_3$**

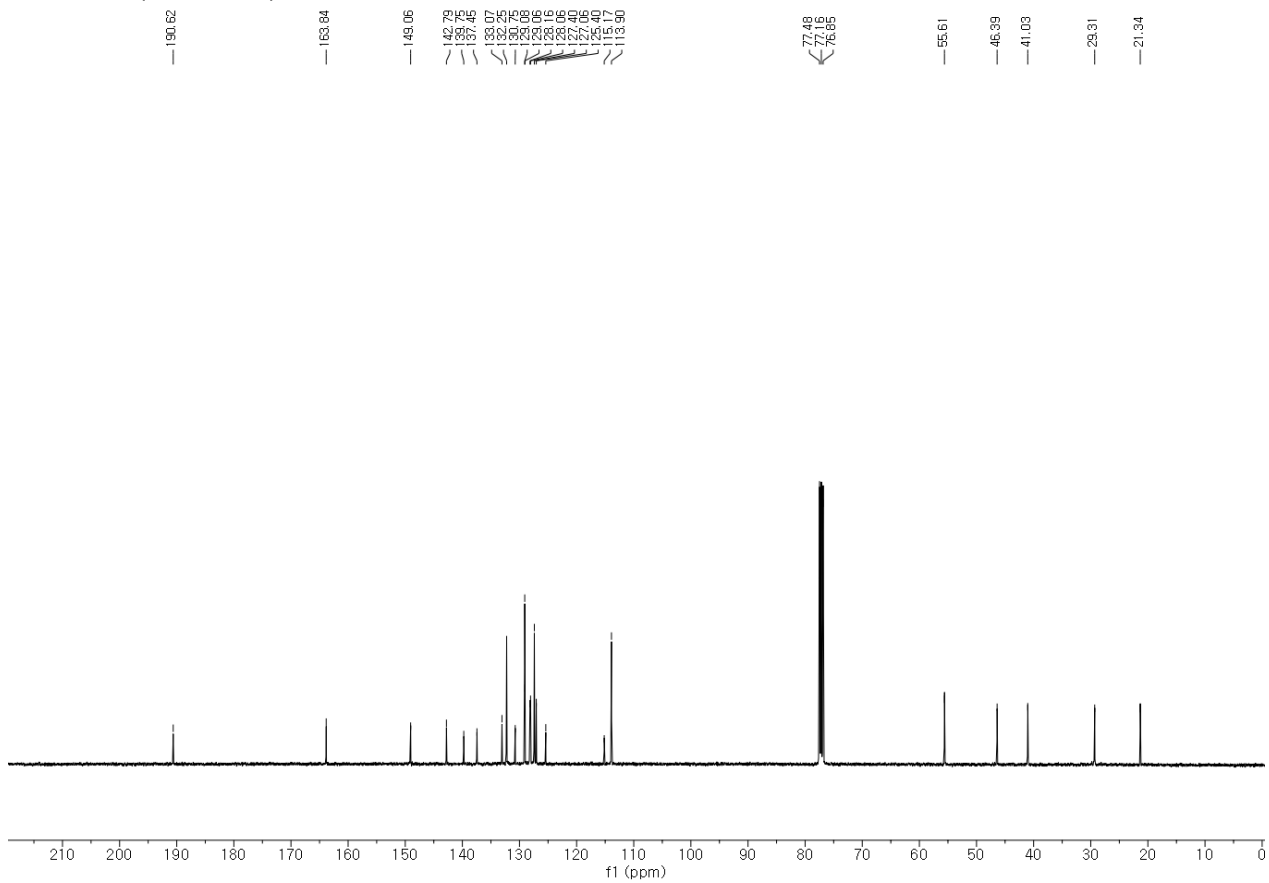

**$^1\text{H}$  NMR (400 MHz) in  $\text{CDCl}_3$** 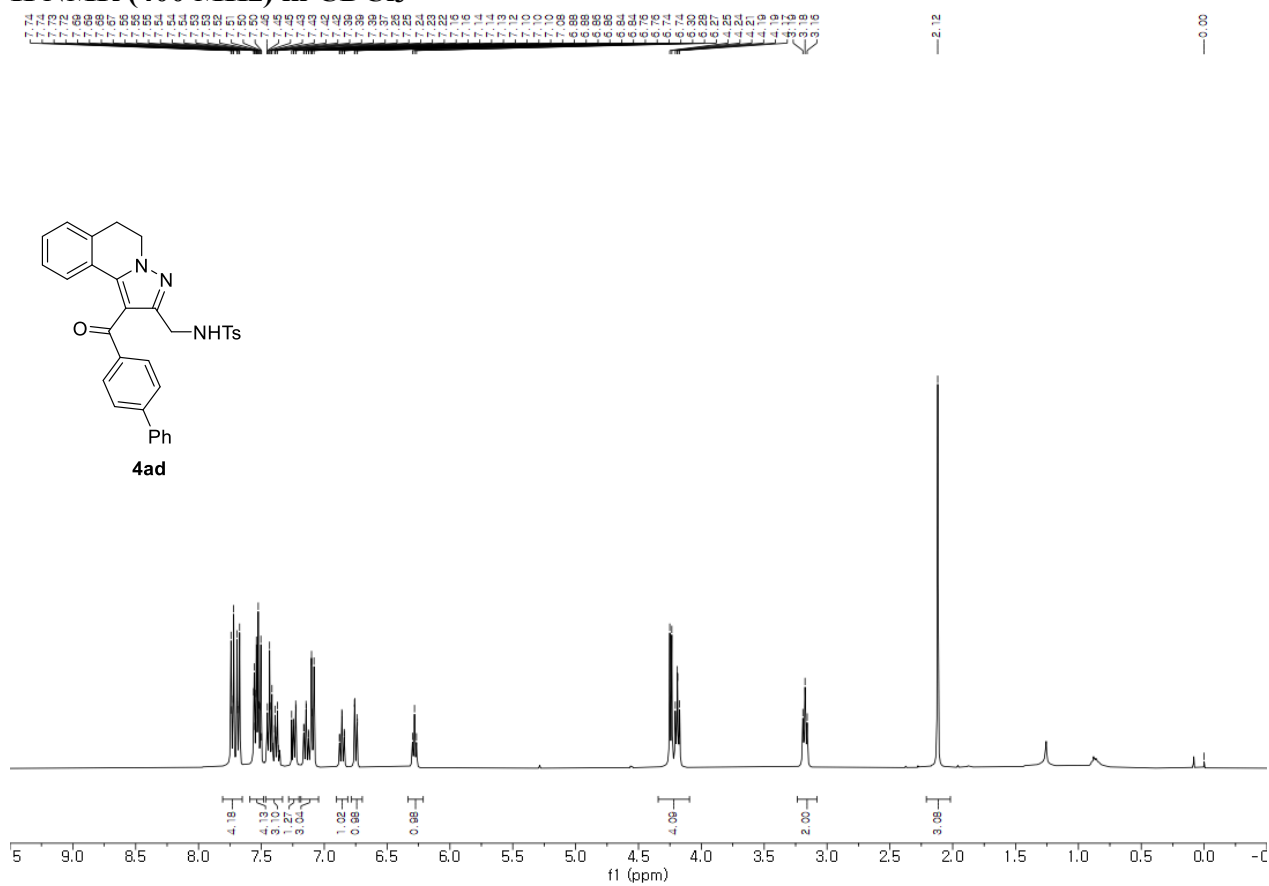 **$^{13}\text{C}$  NMR (100 MHz) in  $\text{CDCl}_3$** 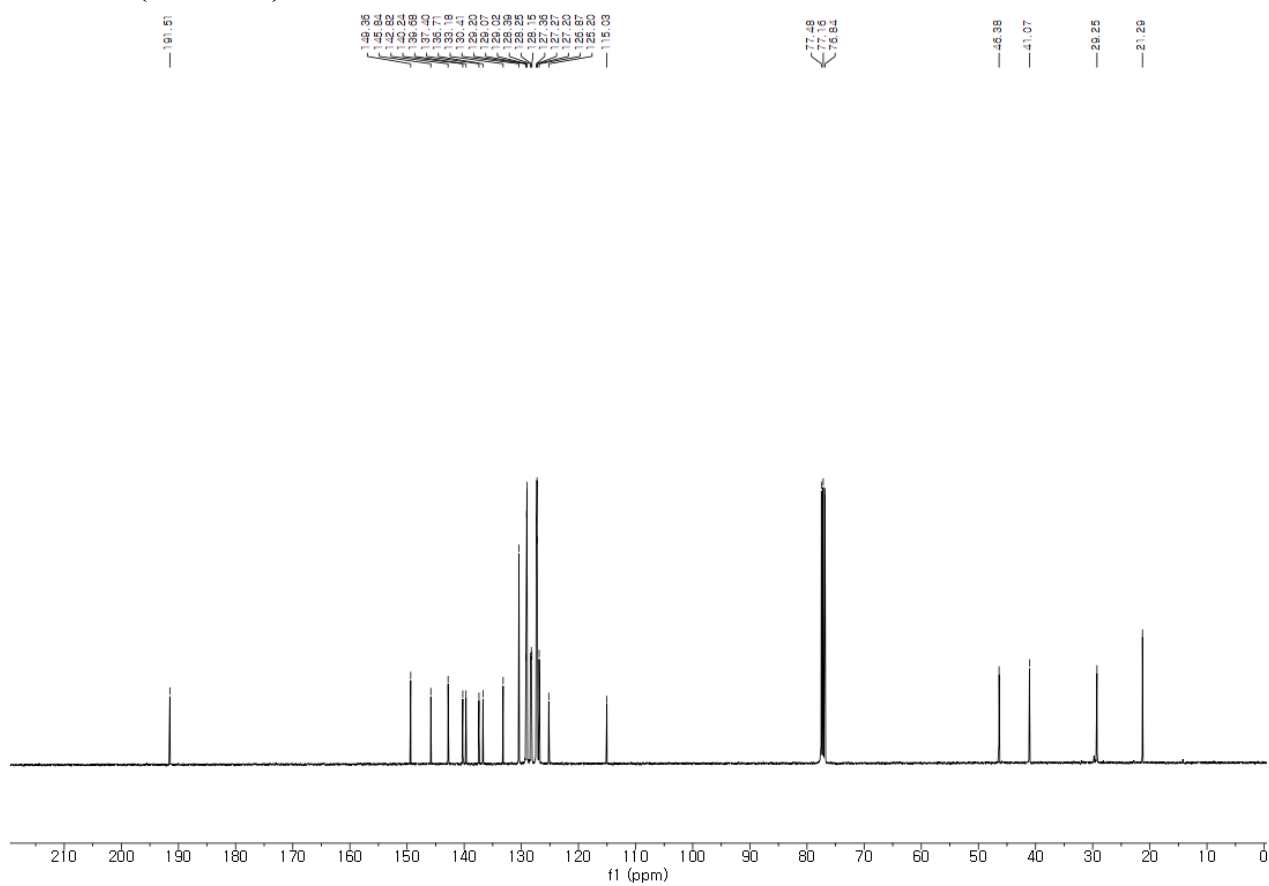

**$^1\text{H}$  NMR (400 MHz) in  $\text{CDCl}_3$** 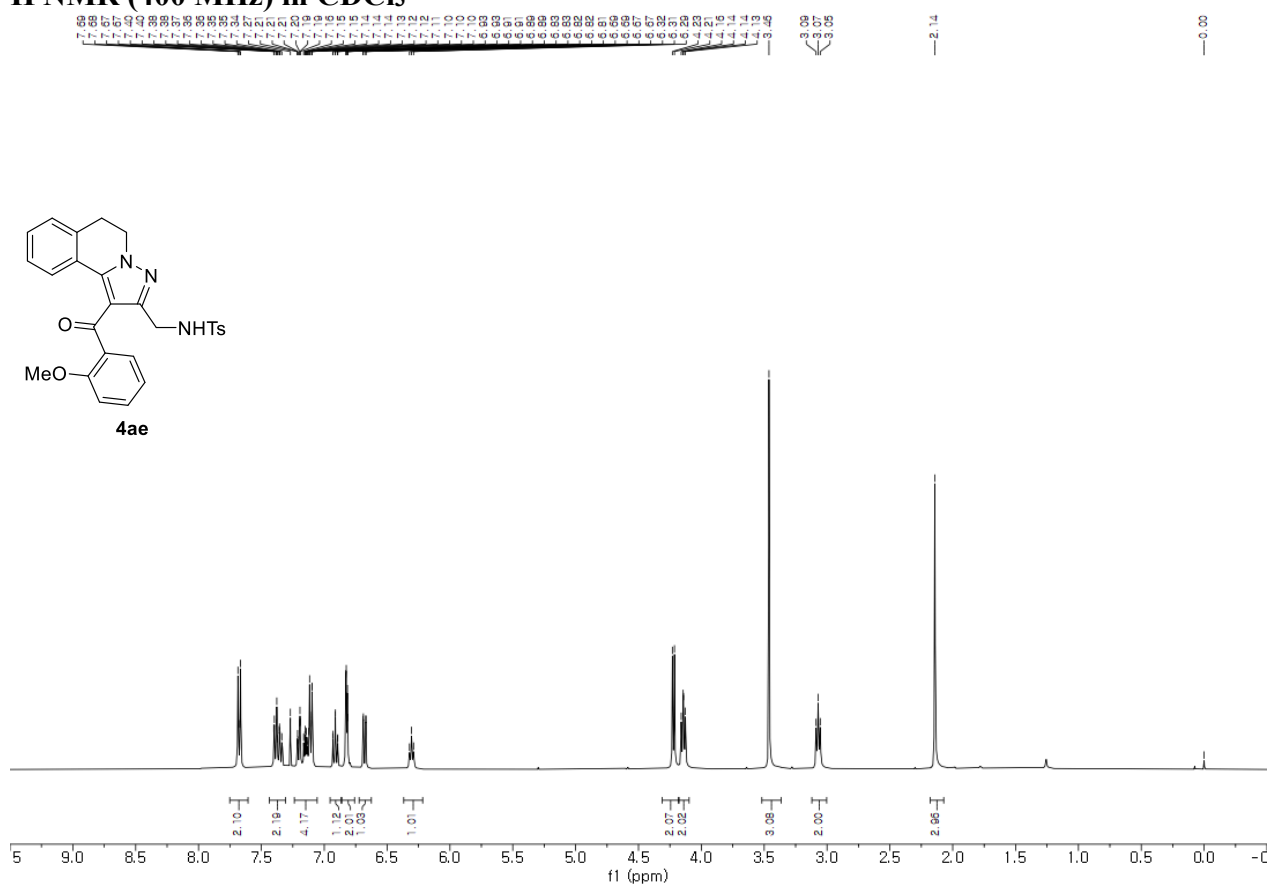 **$^{13}\text{C}$  NMR (100 MHz) in  $\text{CDCl}_3$** 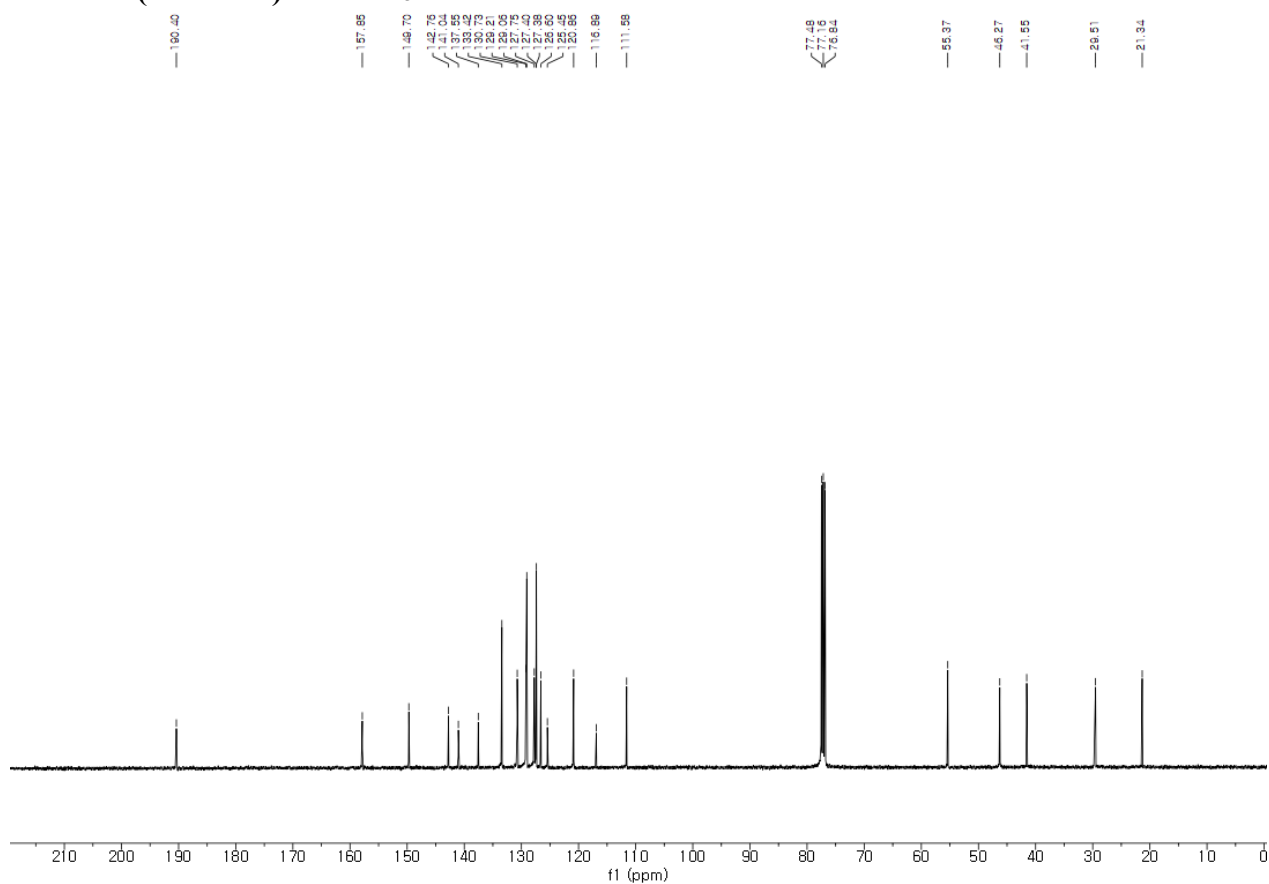

**$^1\text{H}$  NMR (400 MHz) in  $\text{CDCl}_3$** 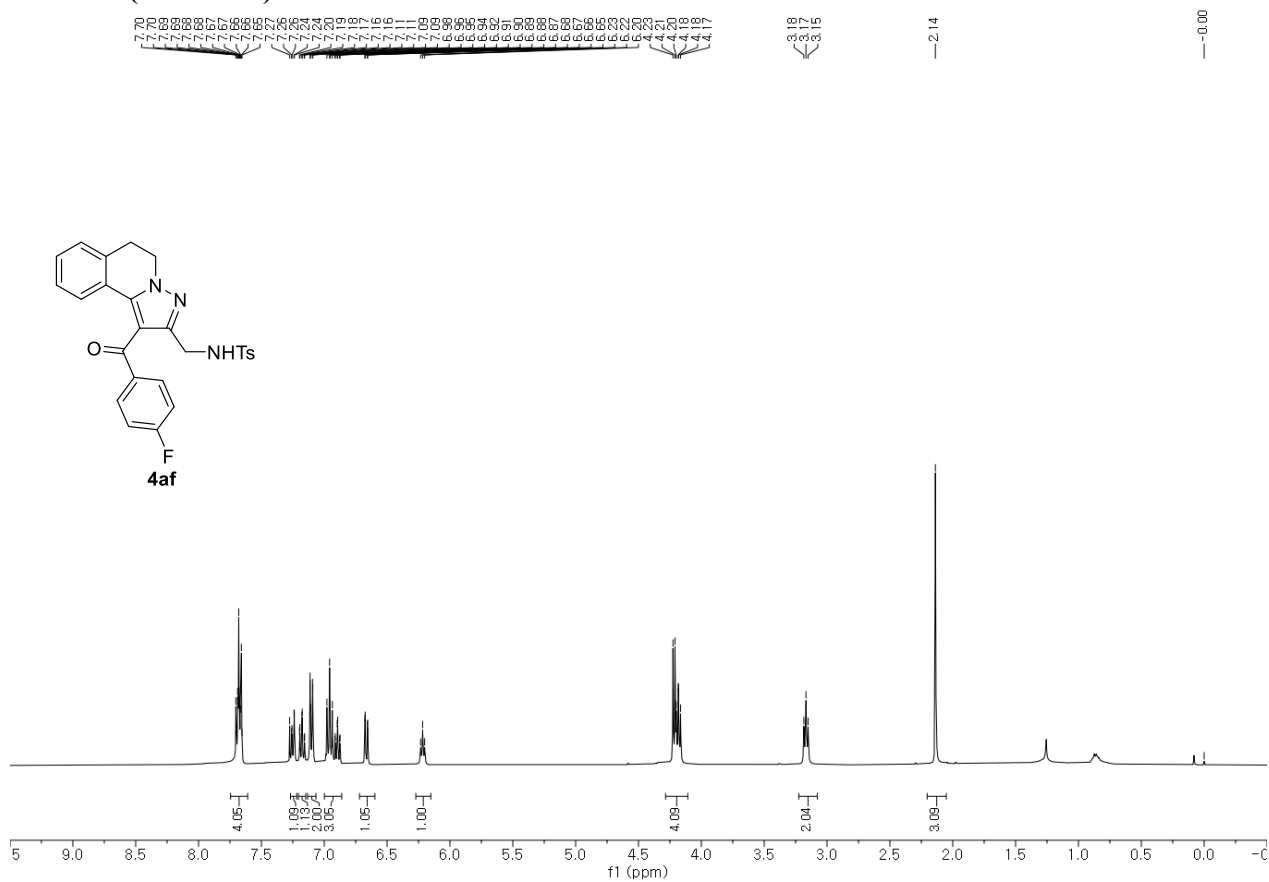 **$^{13}\text{C}$  NMR (100 MHz) in  $\text{CDCl}_3$** 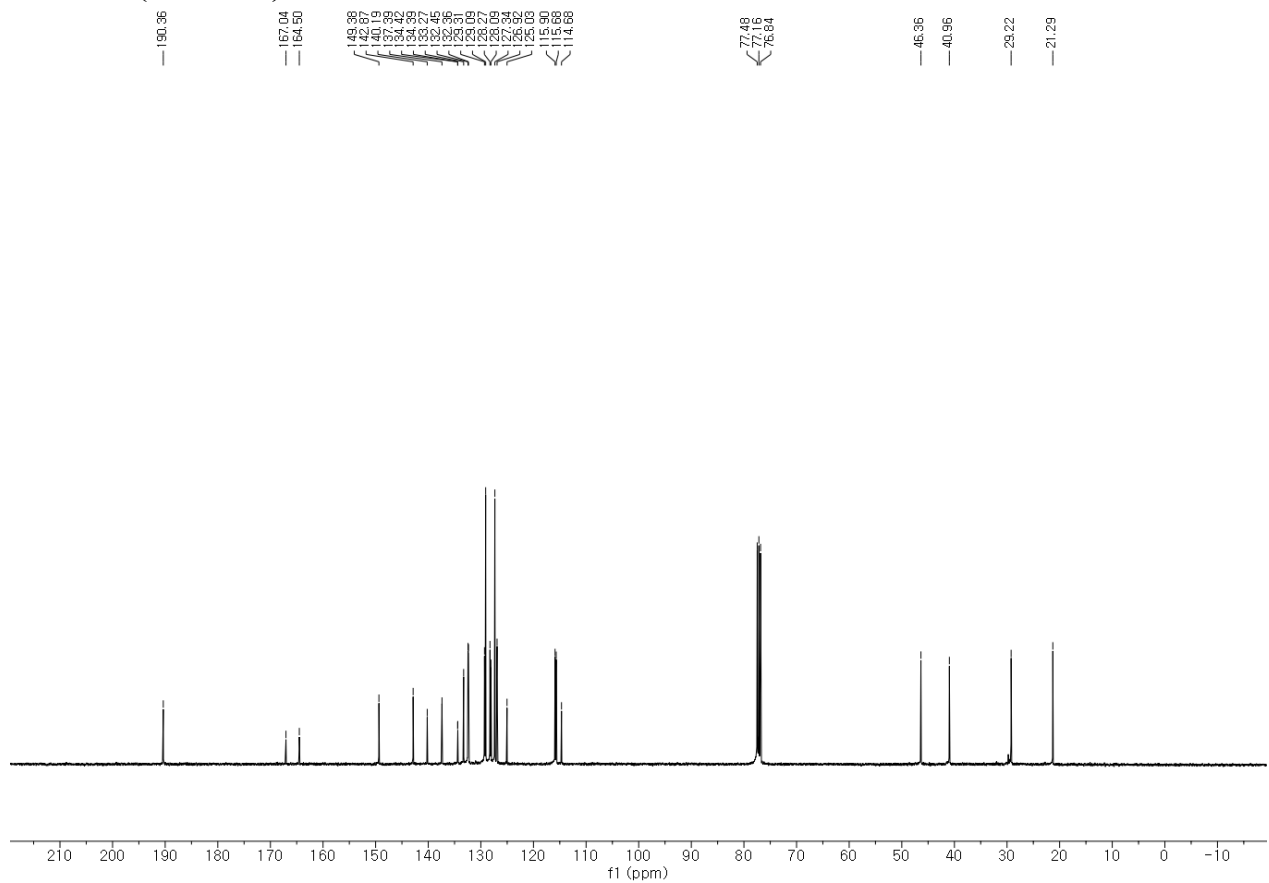

**$^{19}\text{F}$  NMR (376 MHz) in  $\text{CDCl}_3$** 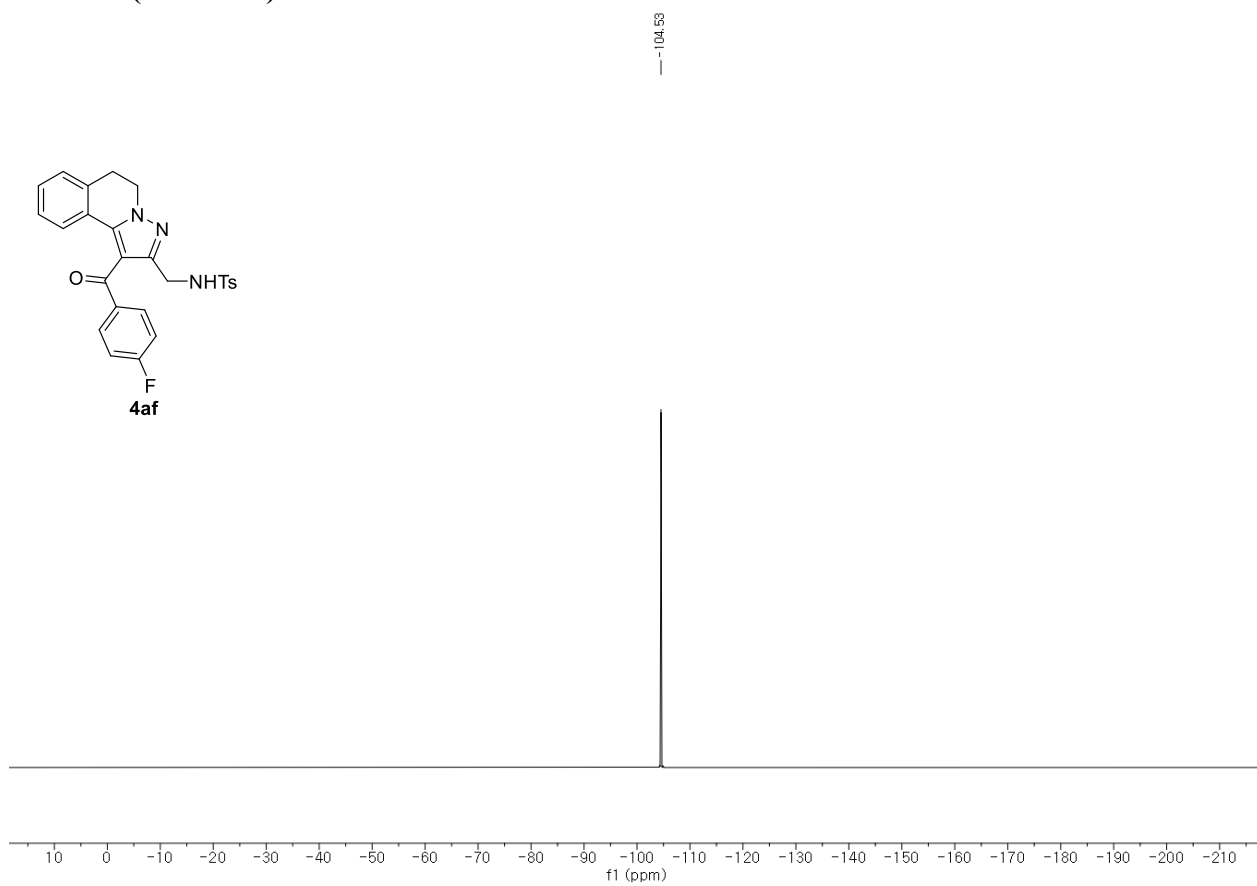



**$^1\text{H}$  NMR (400 MHz) in  $\text{CDCl}_3$** 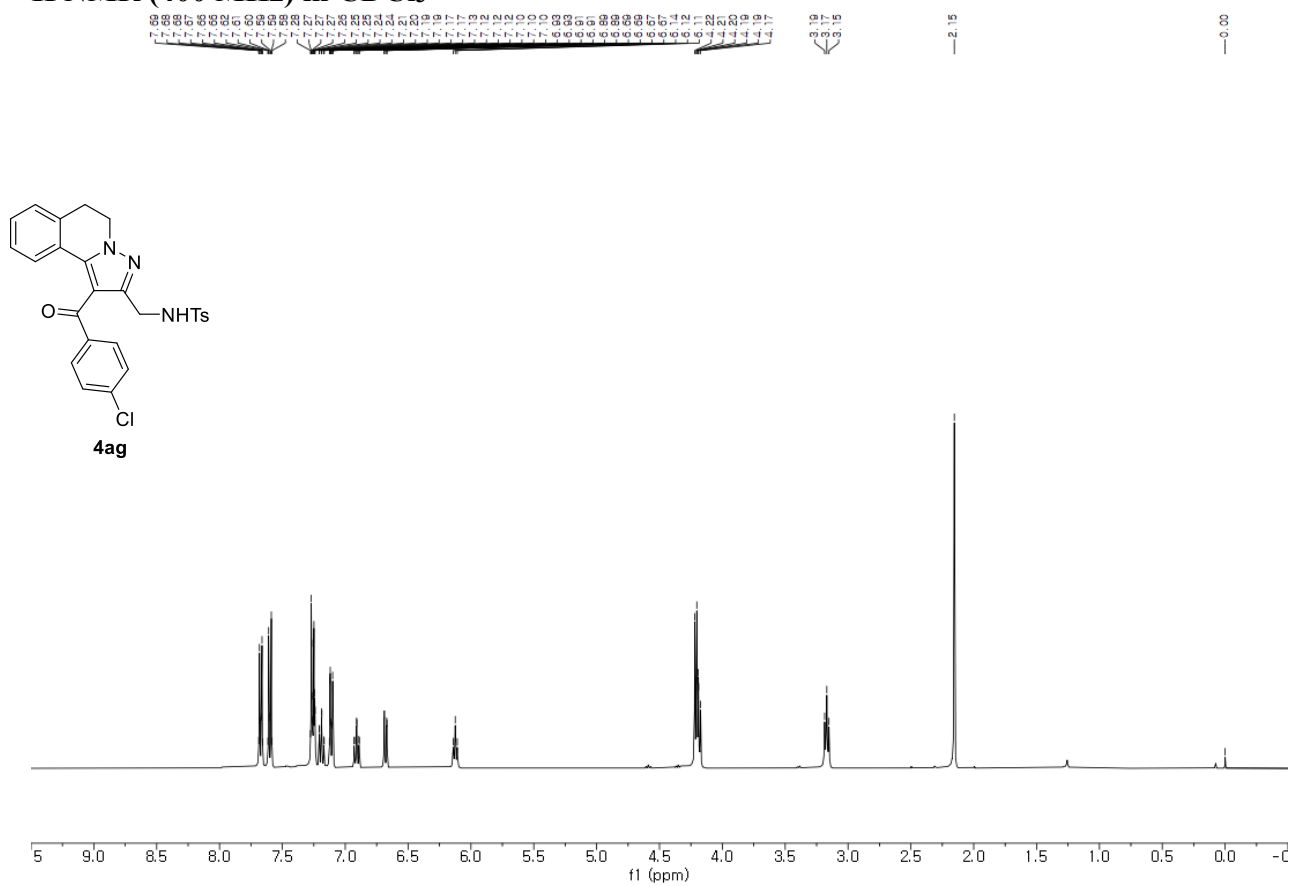 **$^{13}\text{C}$  NMR (100 MHz) in  $\text{CDCl}_3$** 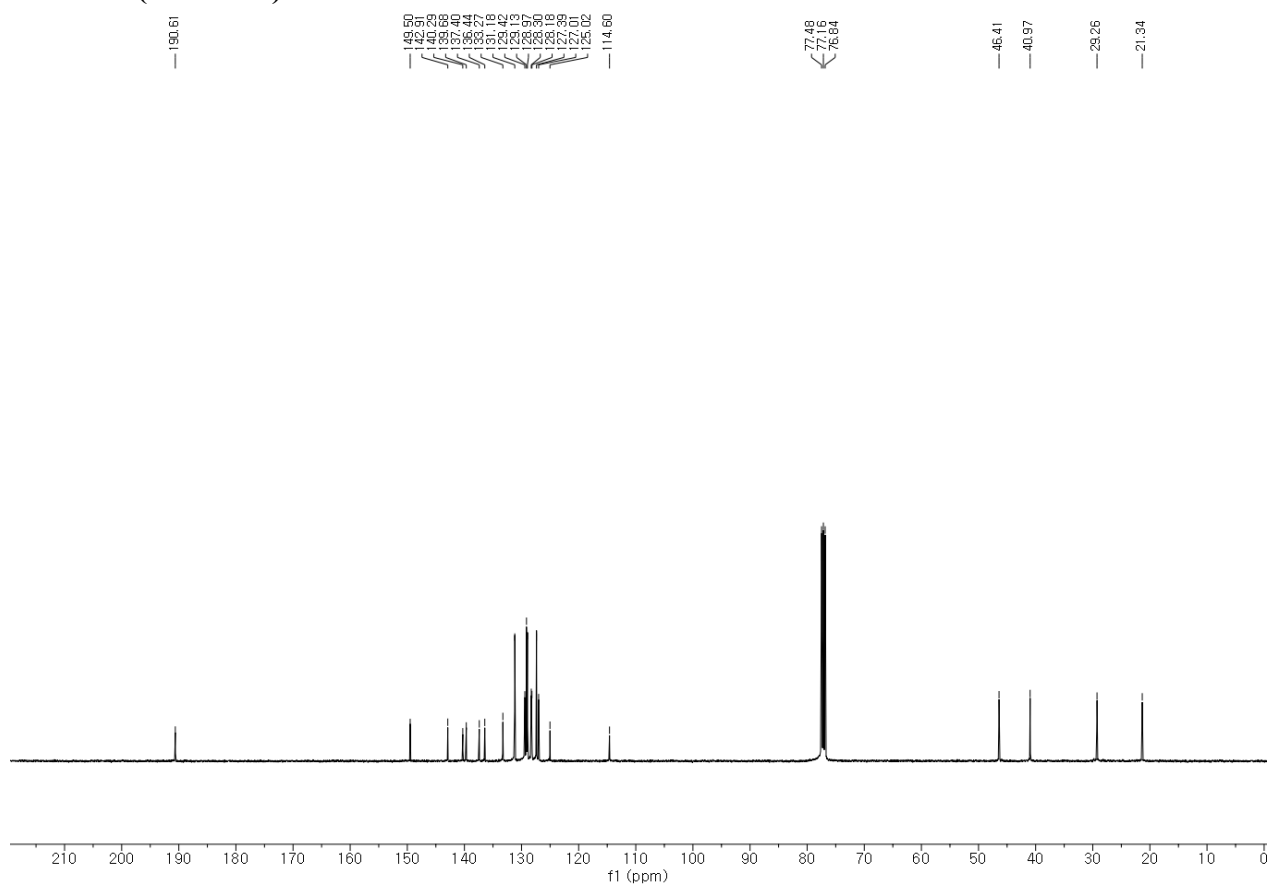

**$^1\text{H}$  NMR (400 MHz) in  $\text{CDCl}_3$** 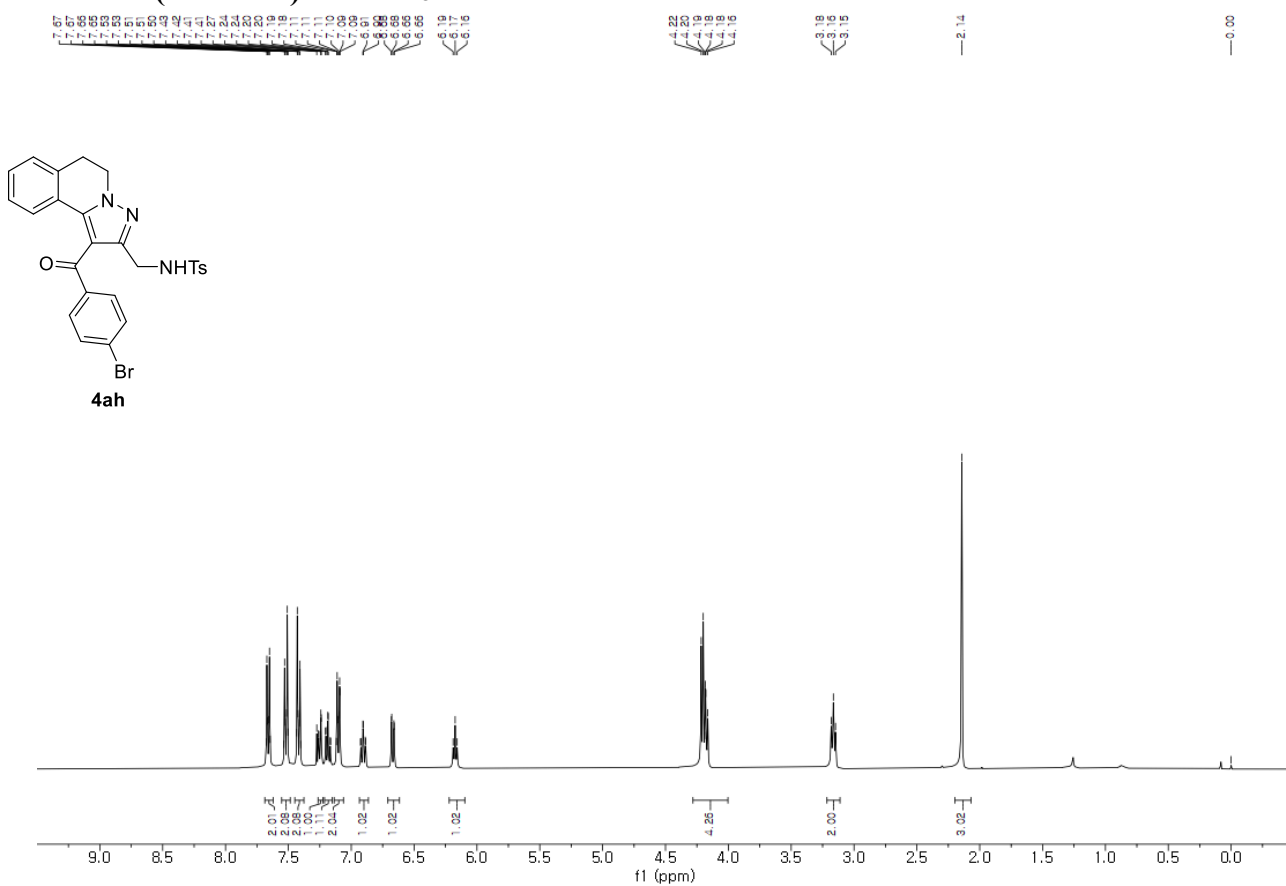 **$^{13}\text{C}$  NMR (100 MHz) in  $\text{CDCl}_3$** 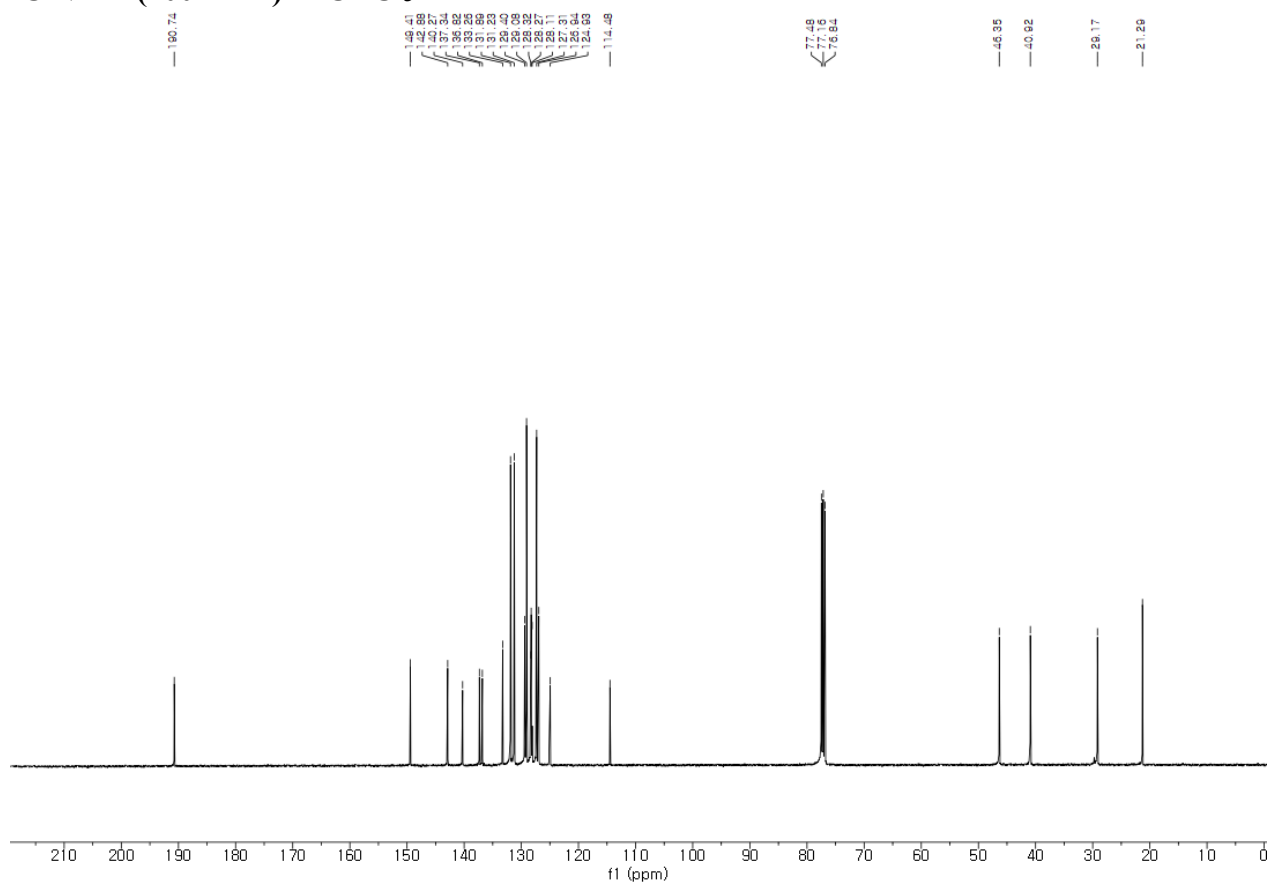

**$^1\text{H}$  NMR (400 MHz) in  $\text{CDCl}_3$** 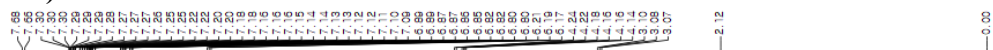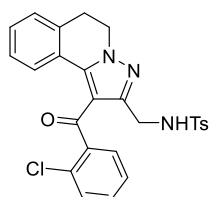**4ai**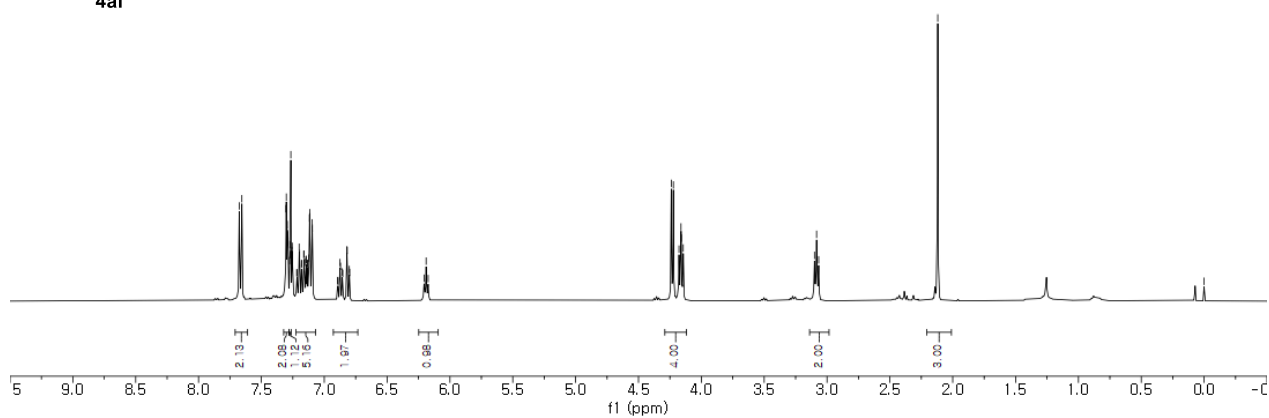 **$^{13}\text{C}$  NMR (100 MHz) in  $\text{CDCl}_3$** 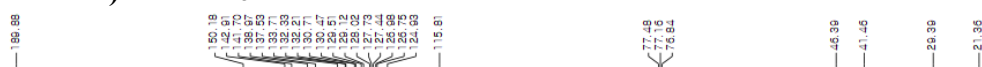

**$^1\text{H}$  NMR (400 MHz) in  $\text{CDCl}_3$** 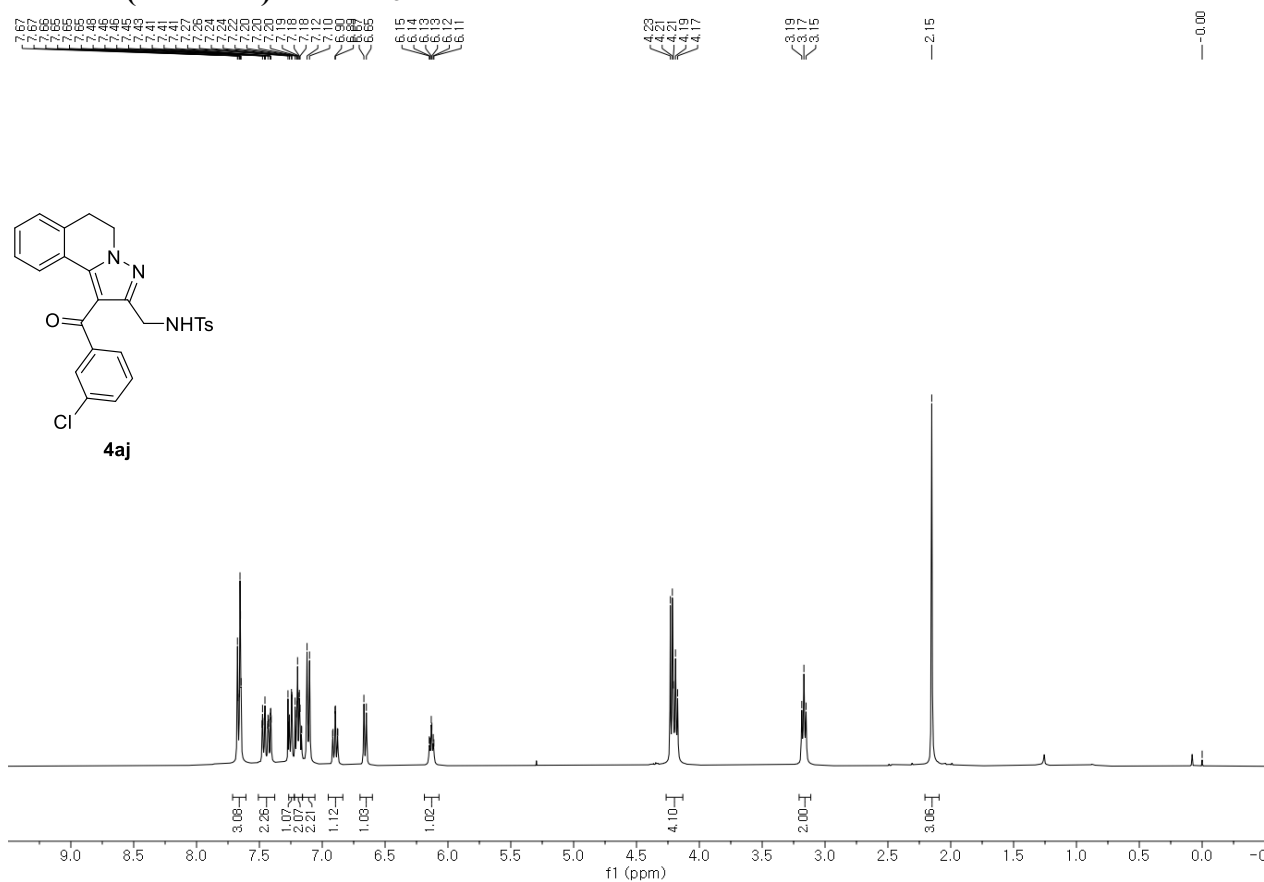 **$^{13}\text{C}$  NMR (100 MHz) in  $\text{CDCl}_3$** 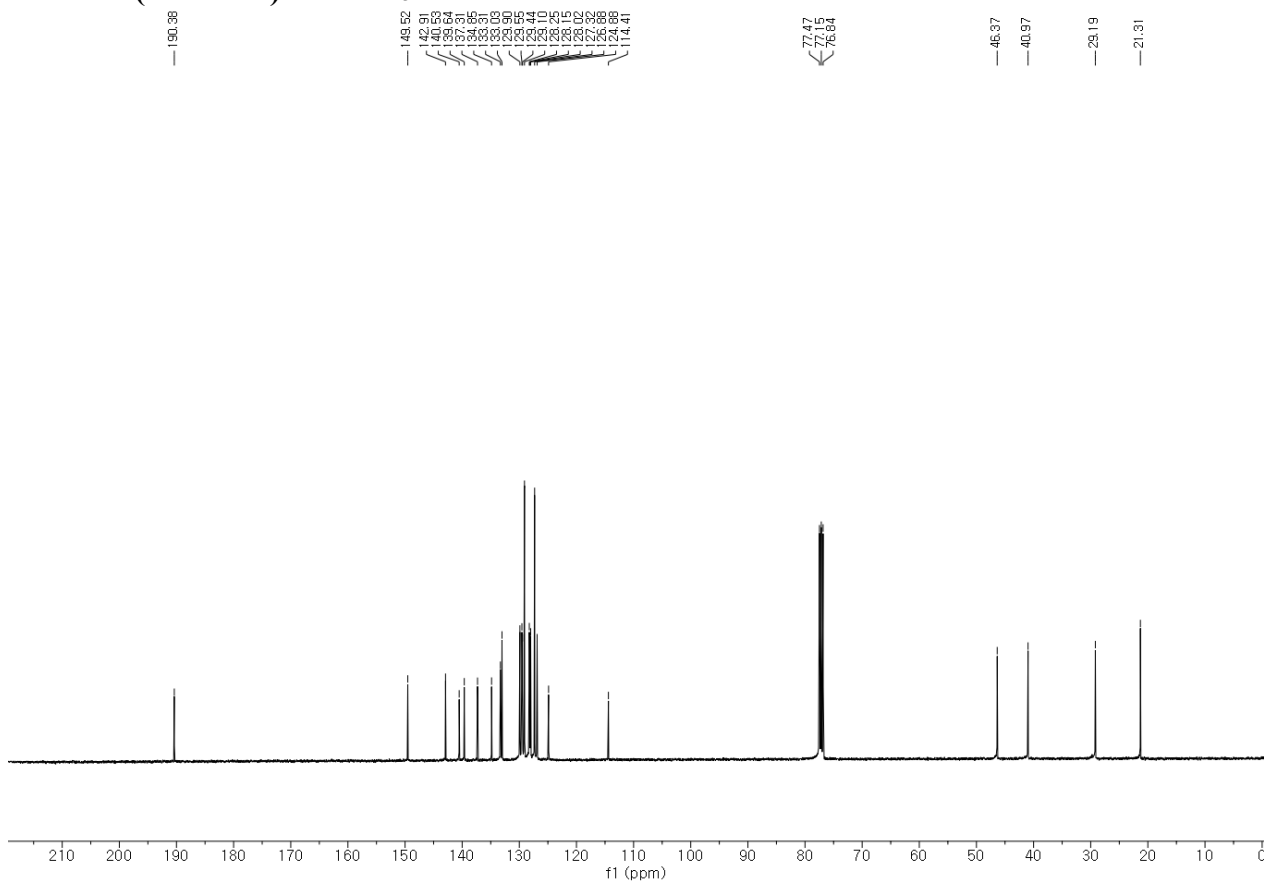

**<sup>1</sup>H NMR (400 MHz) in CDCl<sub>3</sub>**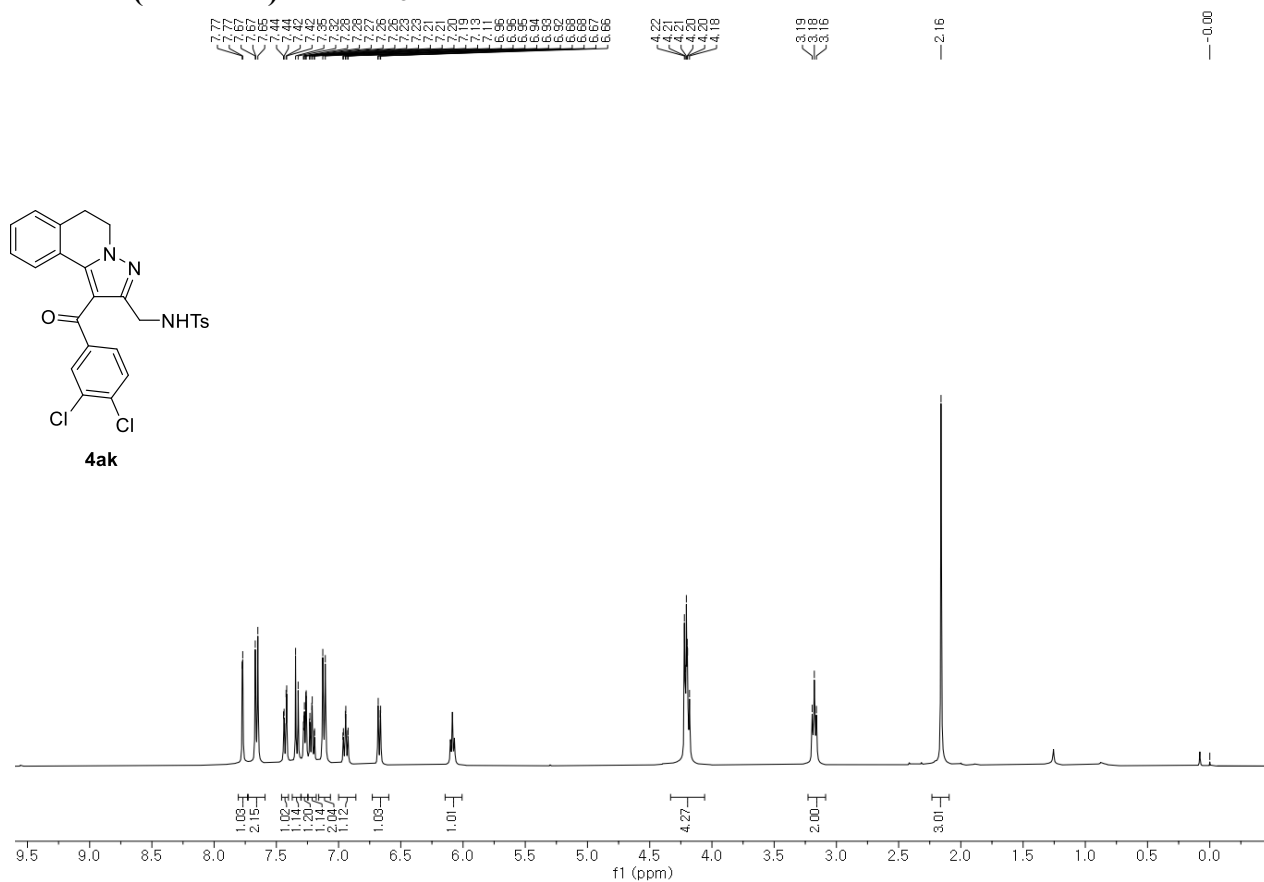**<sup>13</sup>C NMR (100 MHz) in CDCl<sub>3</sub>**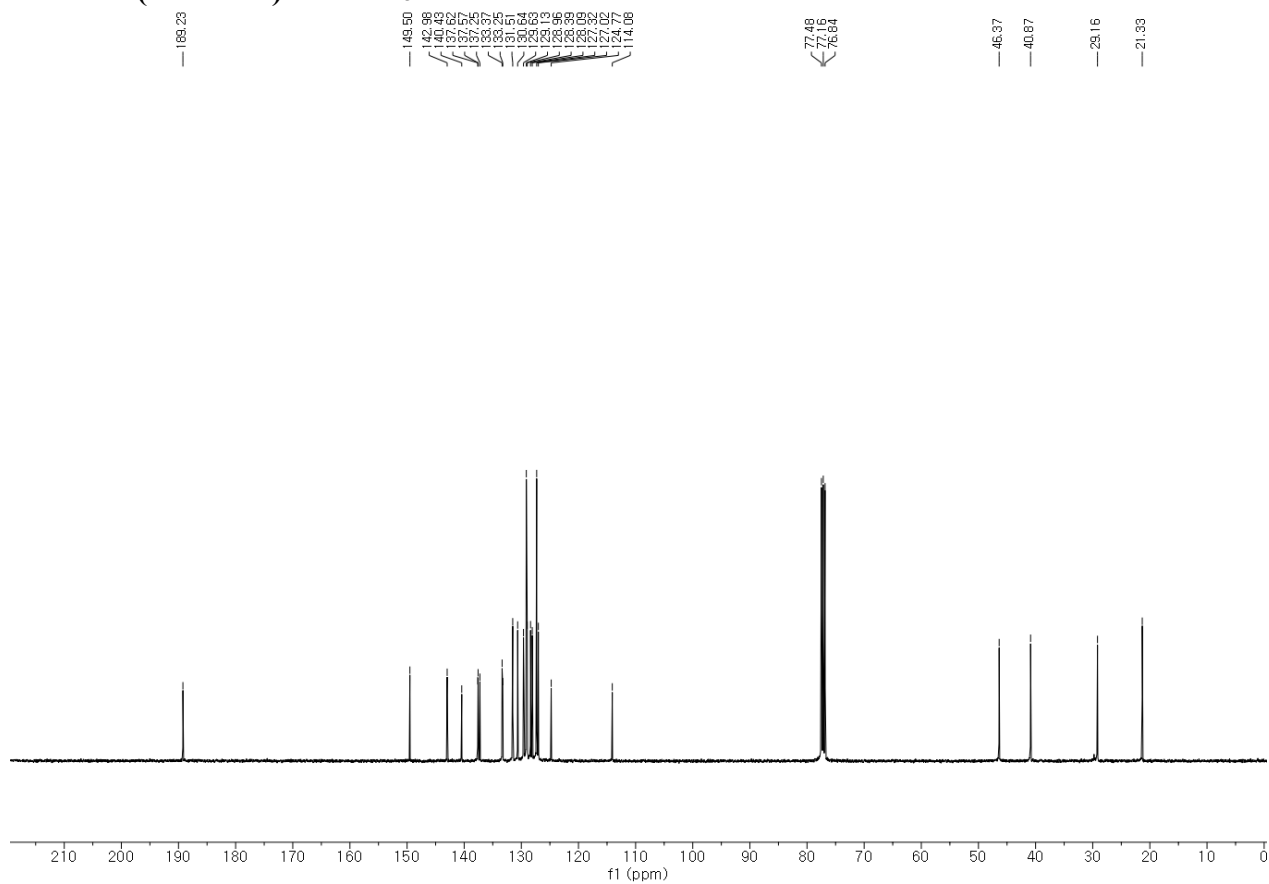

75  
774  
774  
772  
772  
768  
768  
766  
759  
758  
757  
728  
726  
726  
722  
720  
720  
718  
718  
713  
713  
711  
788  
686  
686  
684  
684  
655  
653  
653  
653  
653

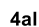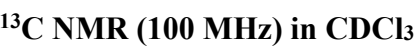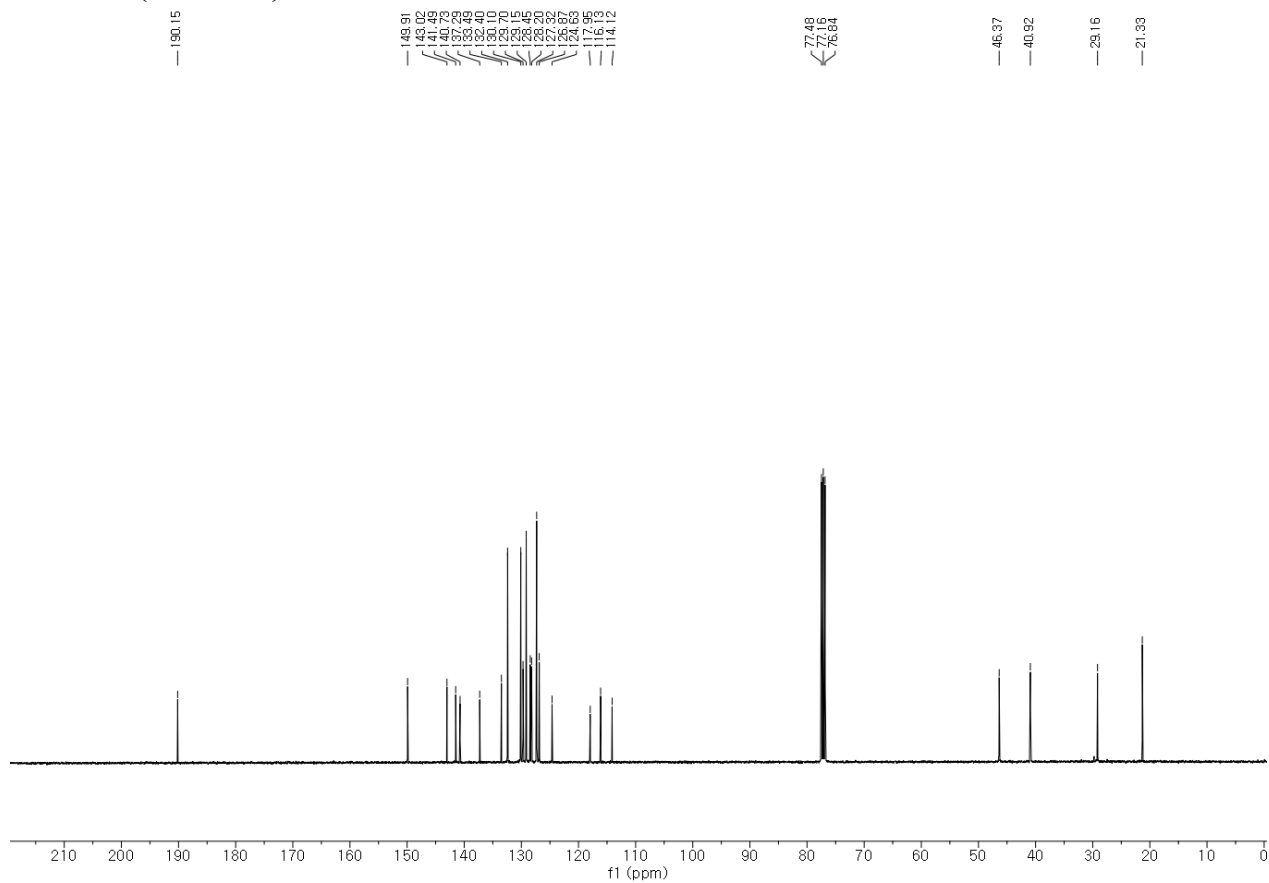

**$^1\text{H}$  NMR (400 MHz) in  $\text{CDCl}_3$** 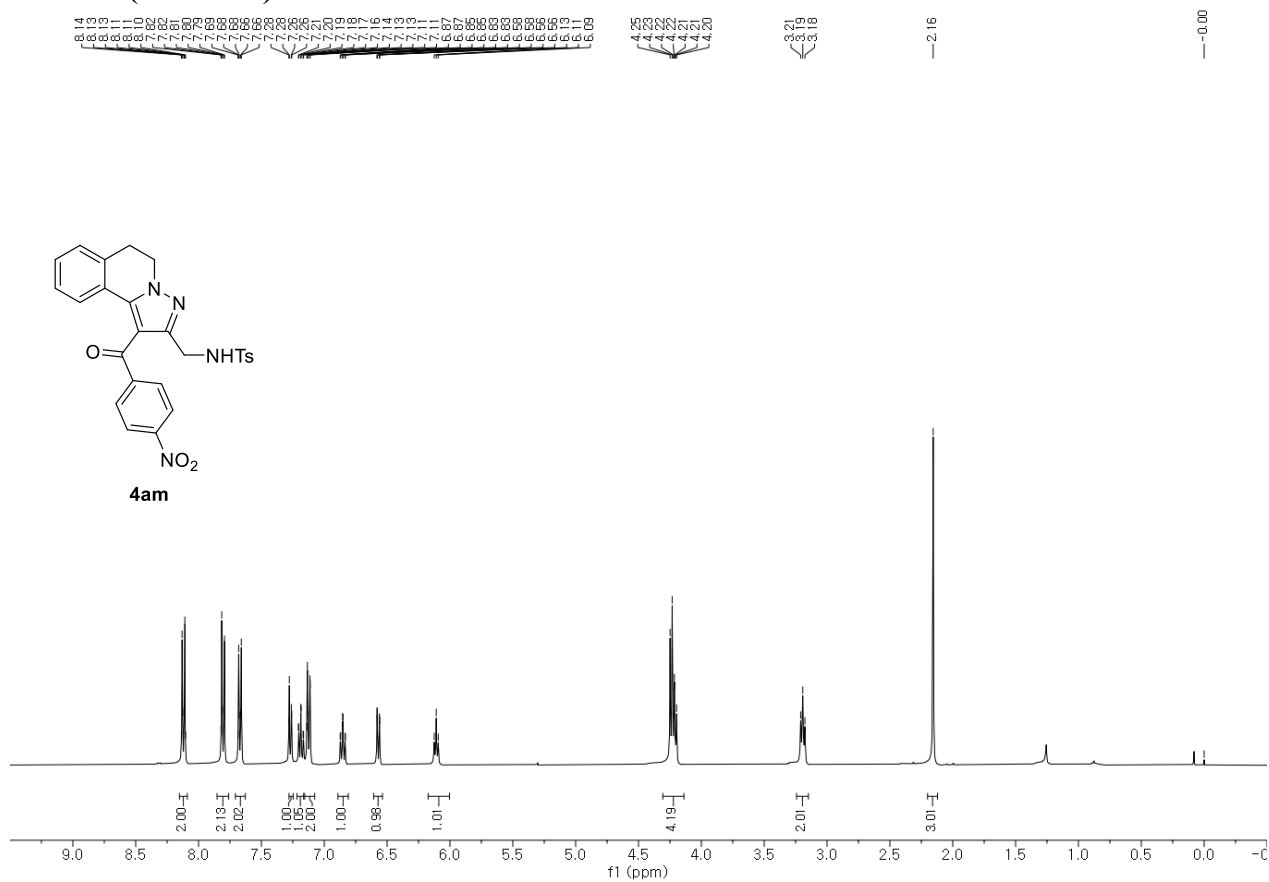 **$^{13}\text{C}$  NMR (100 MHz) in  $\text{CDCl}_3$** 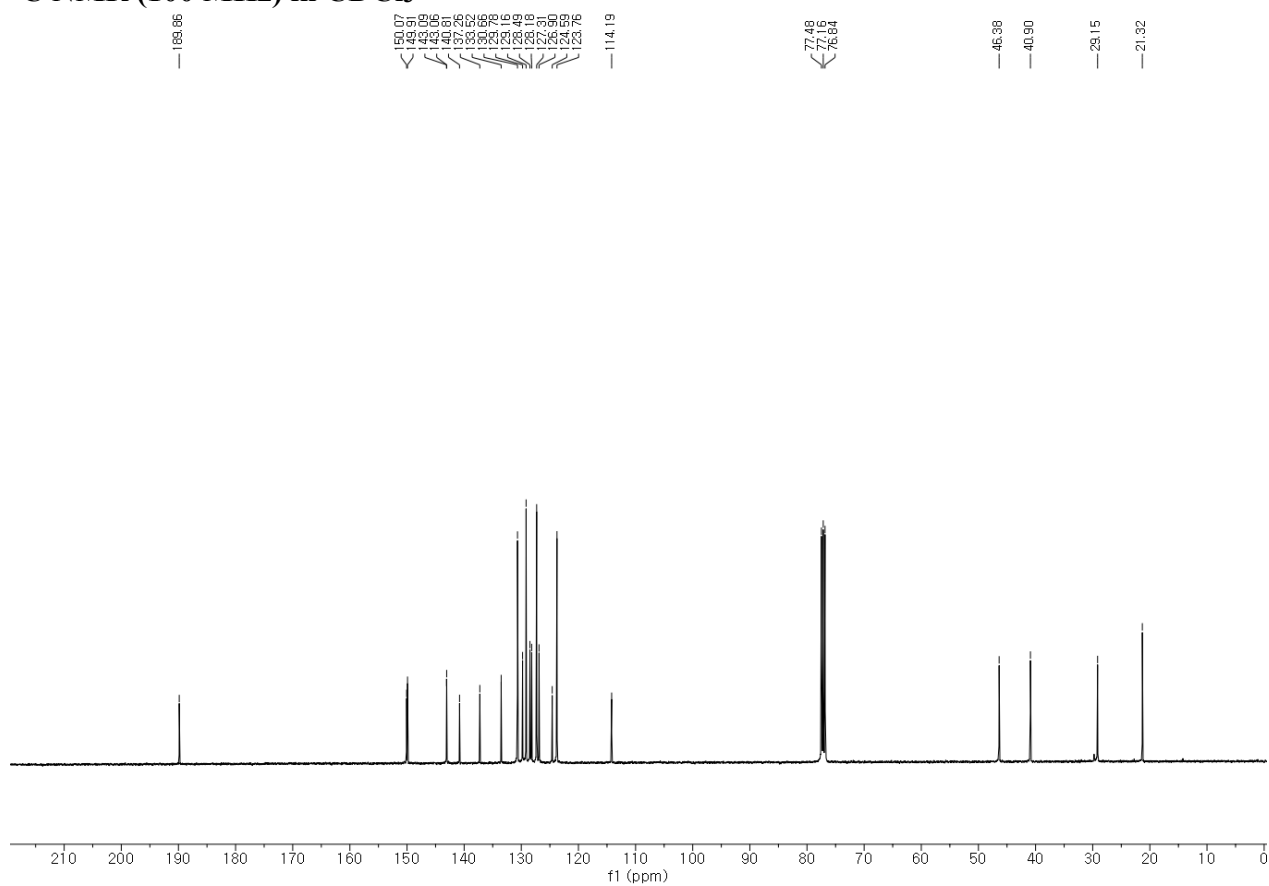

**$^1\text{H}$  NMR (400 MHz) in  $\text{CDCl}_3$** 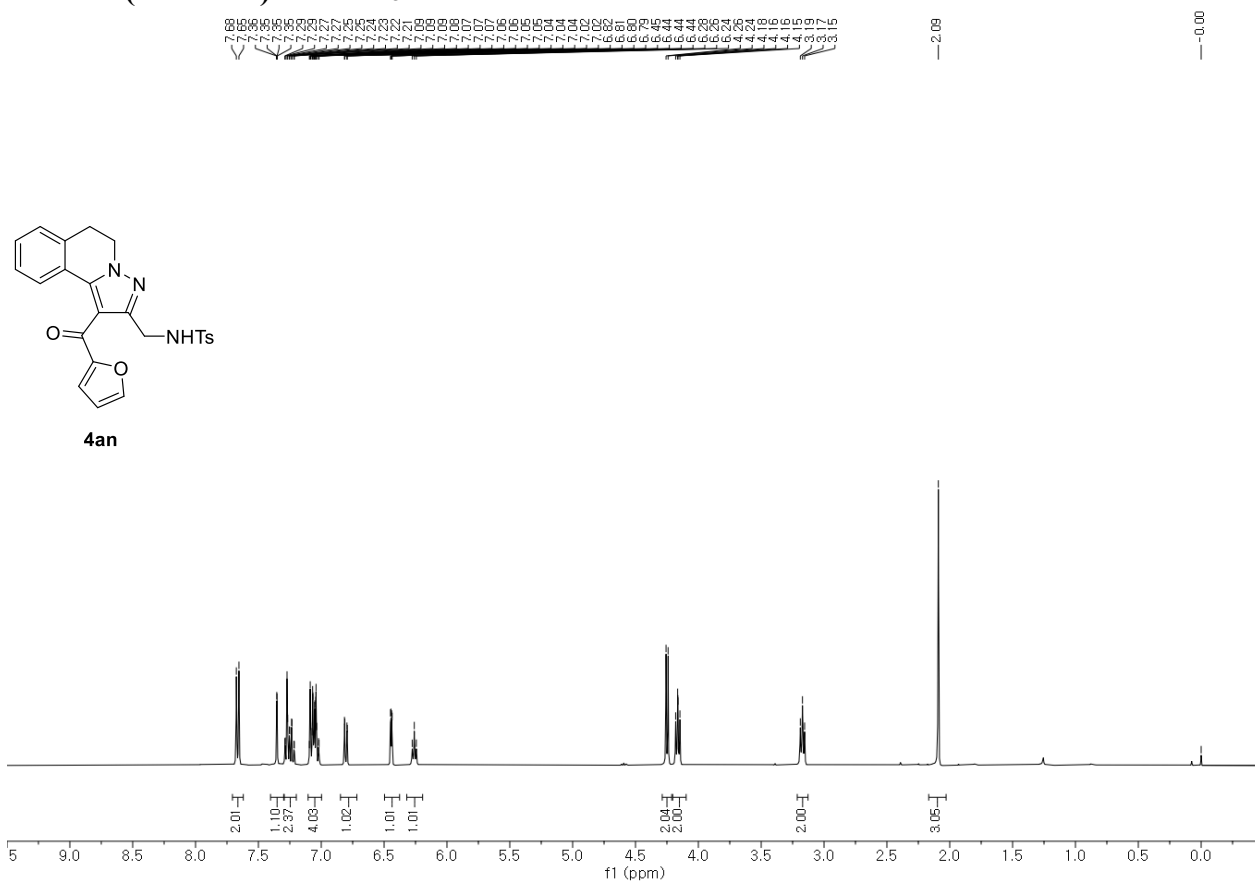 **$^{13}\text{C}$  NMR (100 MHz) in  $\text{CDCl}_3$** 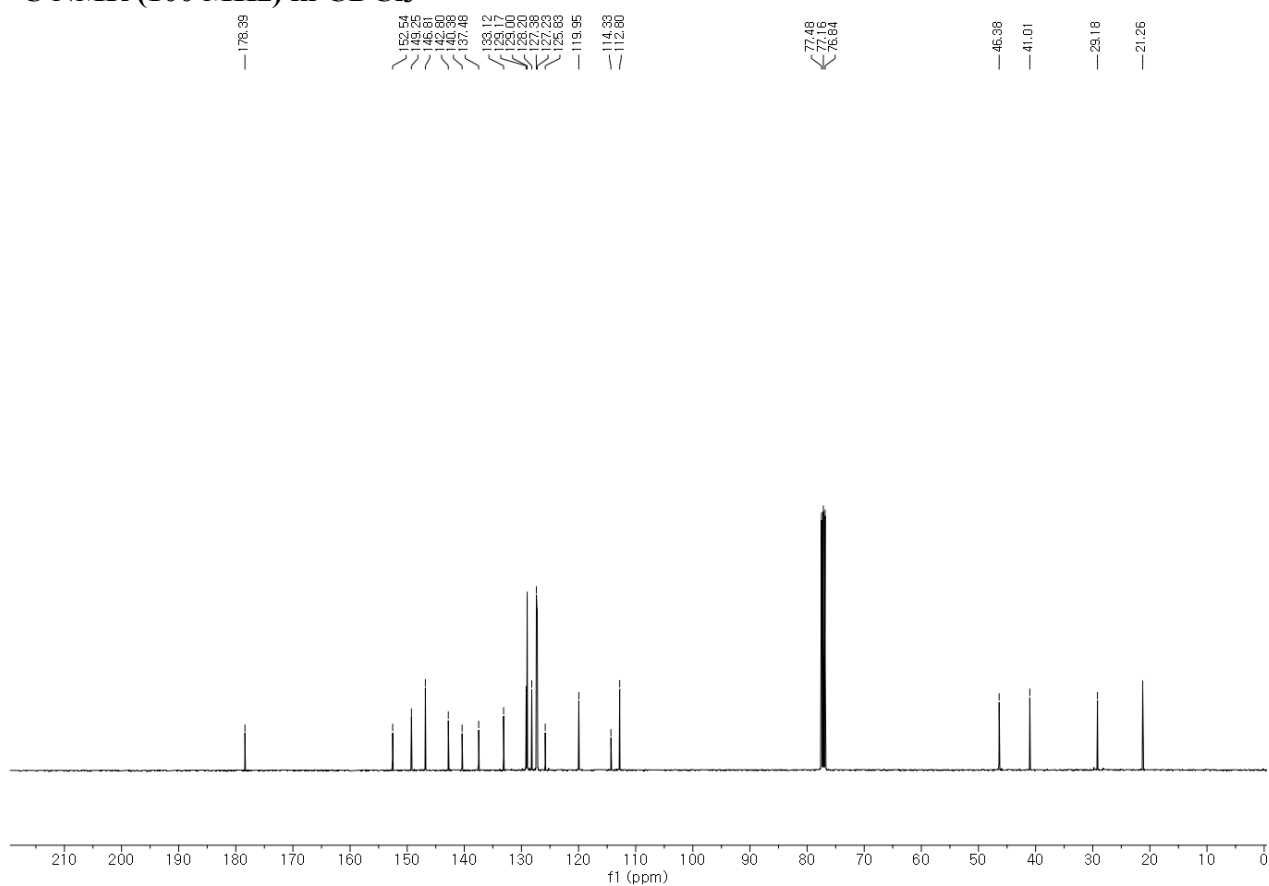



7.68  
7.68  
7.67  
7.66  
7.63  
7.62  
7.61  
7.61  
7.28  
7.27  
7.27  
7.26  
7.26  
7.25  
7.25  
7.23  
7.23  
7.21  
7.19  
7.19  
7.11  
7.10  
7.10  
7.09  
7.08  
7.08  
7.07  
7.03  
7.02  
7.01  
7.00  
6.99  
6.94  
6.93  
6.92  
6.90  
6.89  
6.89  
6.88  
6.87  
6.85  
6.84  
4.24  
4.23  
4.19  
4.17  
4.17  
4.15  
3.97  
3.95

**4ao**

<sup>1</sup>H NMR spectrum (CDCl<sub>3</sub>) of compound **4ao**. The x-axis represents the chemical shift in ppm, ranging from 0.0 to 10.0. The spectrum shows several peaks: a multiplet between 7.0 and 7.6 ppm, a doublet at approximately 6.1 ppm, a multiplet at approximately 4.2 ppm, a multiplet at approximately 3.1 ppm, a singlet at approximately 2.1 ppm, a singlet at approximately 1.2 ppm, and a reference peak at 0.0 ppm (TMS).

|        |       |       |
|--------|-------|-------|
| 180.60 | 46.80 | 77.48 |
| 181.60 | 47.80 | 77.16 |
| 182.60 | 48.80 | 76.84 |
| 183.60 | 49.80 | 46.39 |
| 184.60 | 50.80 | 40.87 |
| 185.60 | 51.80 | 29.23 |
| 186.60 | 52.80 | 21.29 |

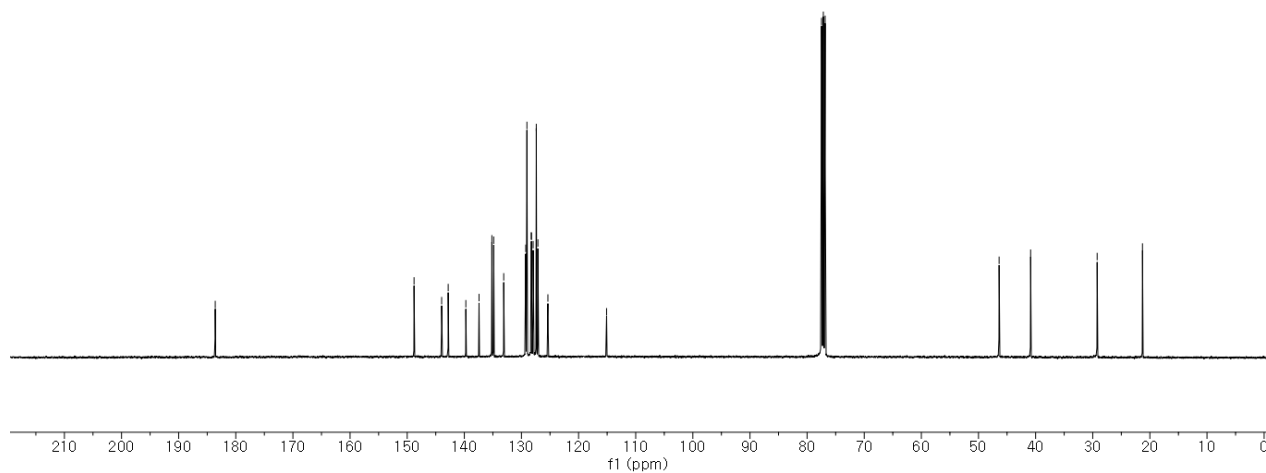

**<sup>1</sup>H NMR (400 MHz) in CDCl<sub>3</sub>**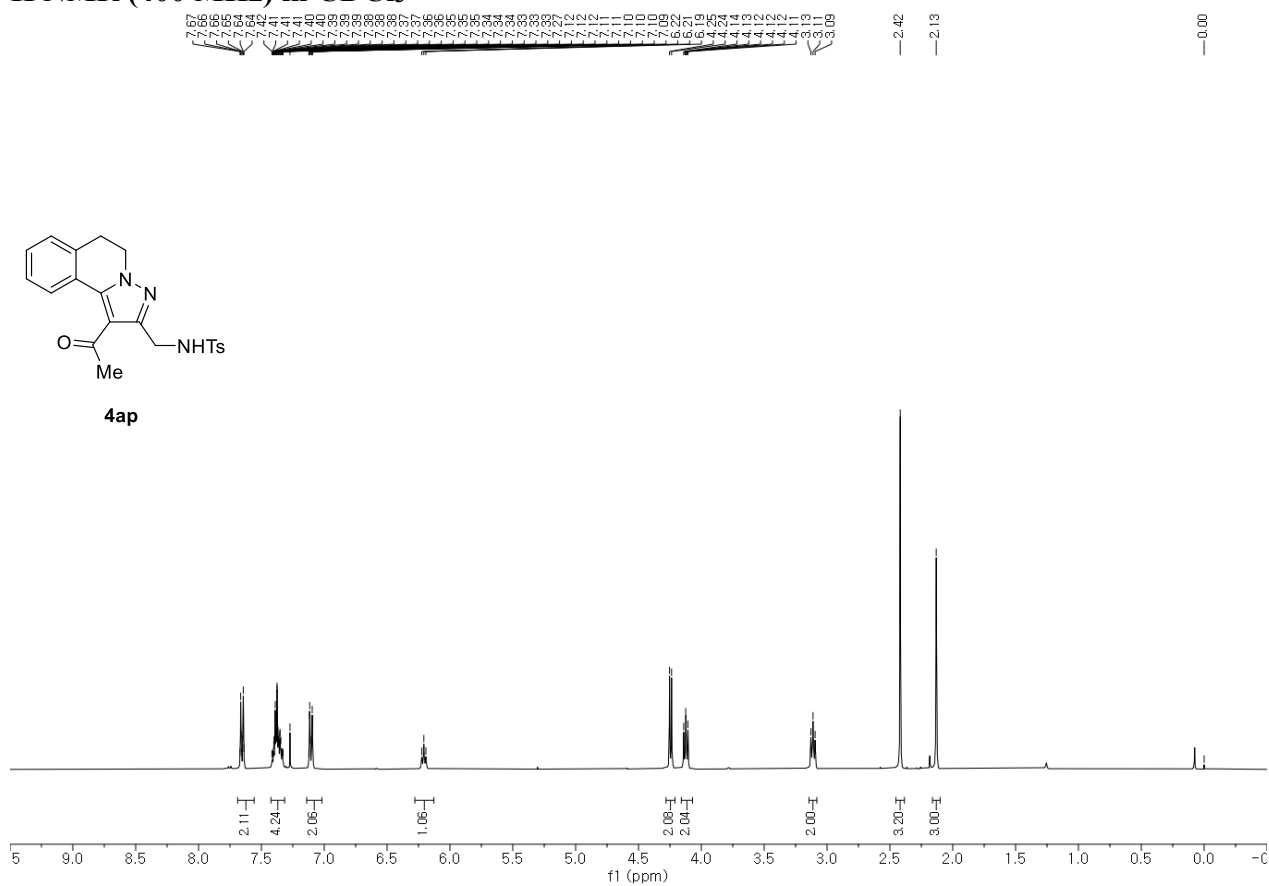**<sup>13</sup>C NMR (100 MHz) in CDCl<sub>3</sub>**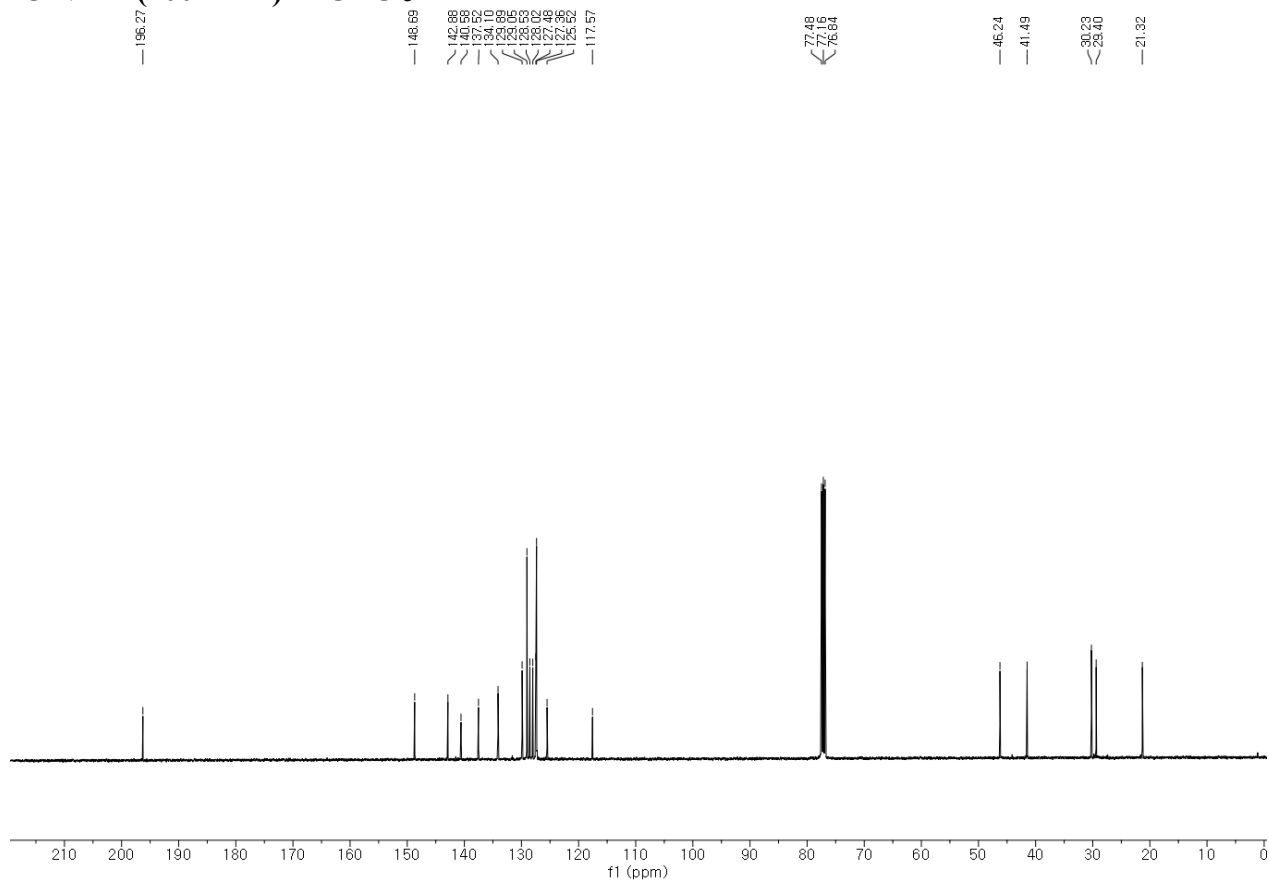

**$^1\text{H}$  NMR (400 MHz) in  $\text{CDCl}_3$** 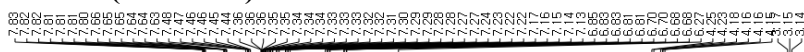

0.00

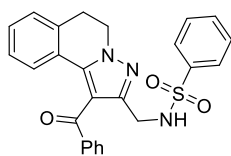**4aq**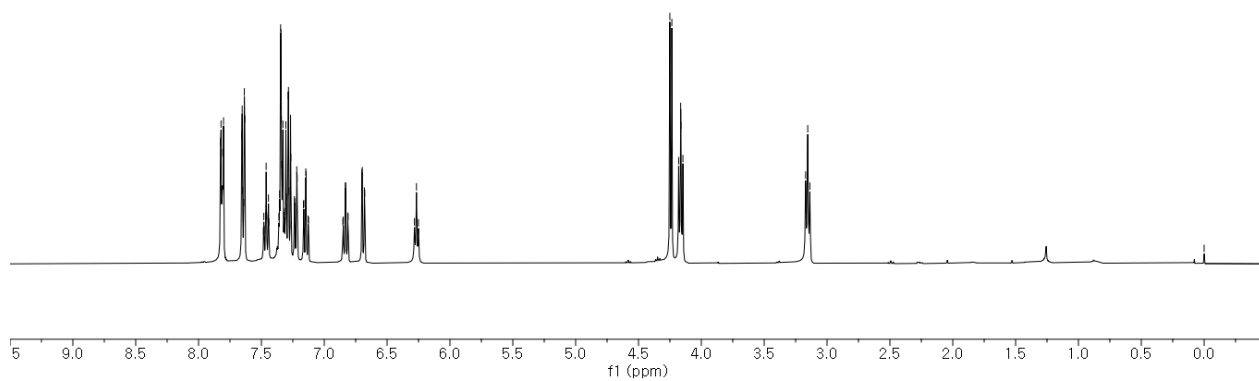 **$^{13}\text{C}$  NMR (100 MHz) in  $\text{CDCl}_3$** 

192.14

149.43

140.39  
140.31  
138.04  
135.05  
132.14  
129.42  
128.56  
128.03  
127.77  
126.95  
126.09  
114.1477.48  
77.15  
76.84

46.32

40.99

29.27

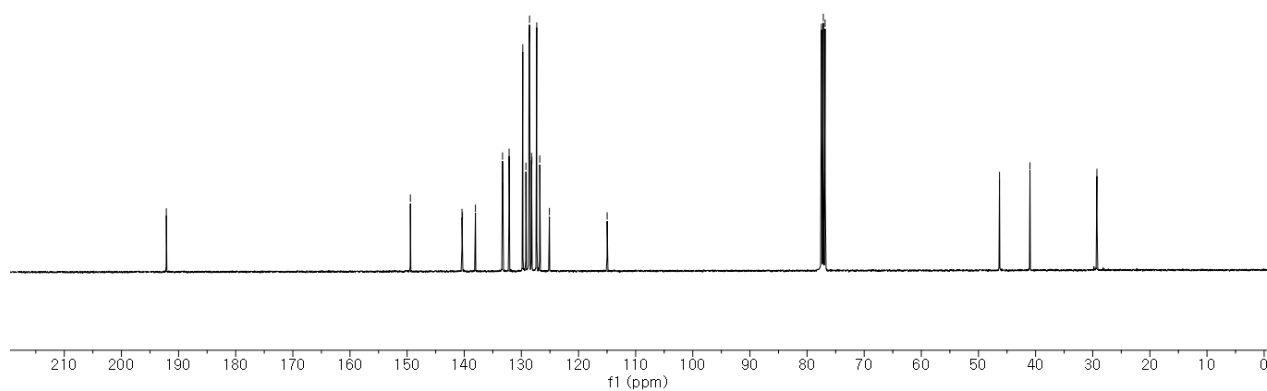

**<sup>1</sup>H NMR (400 MHz) in CDCl<sub>3</sub>**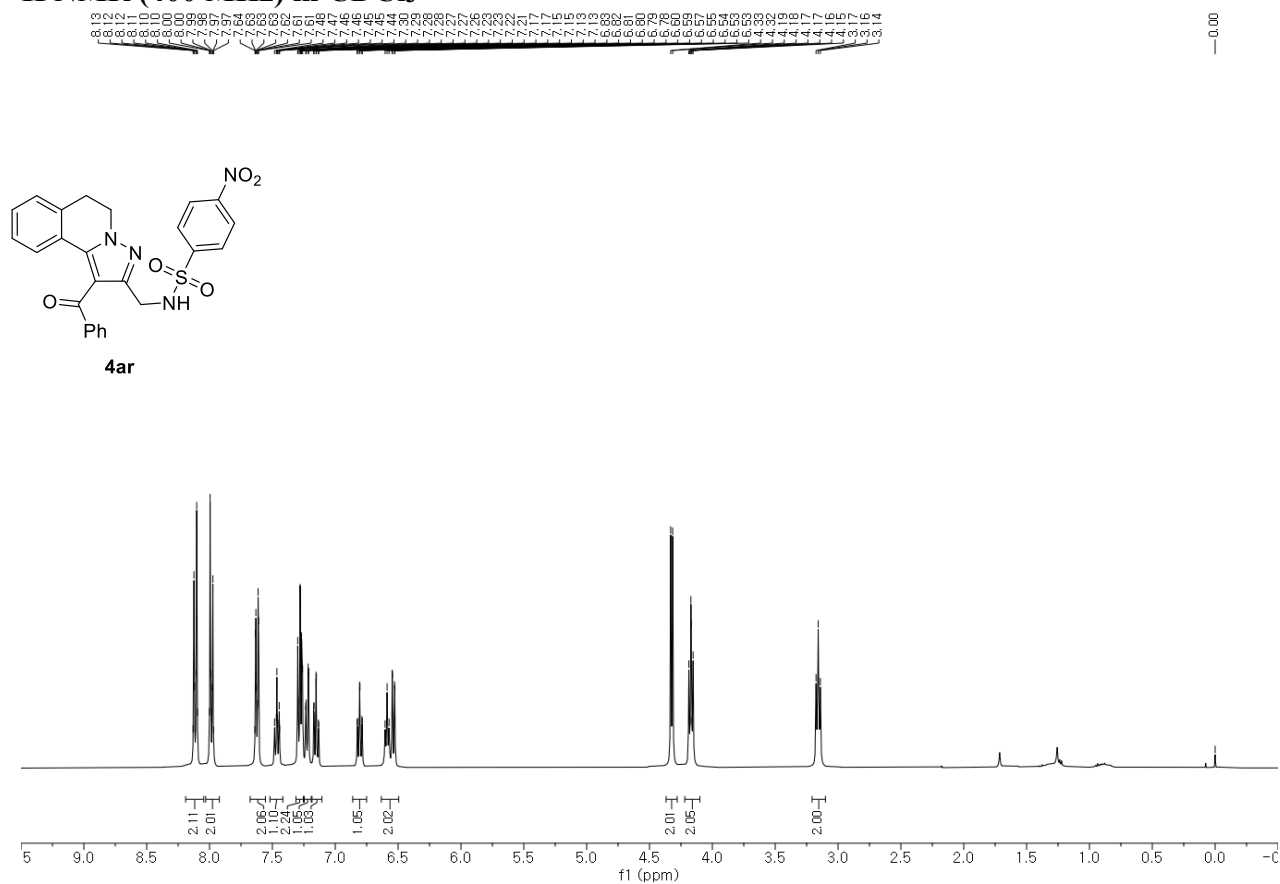**<sup>13</sup>C NMR (100 MHz) in CDCl<sub>3</sub>**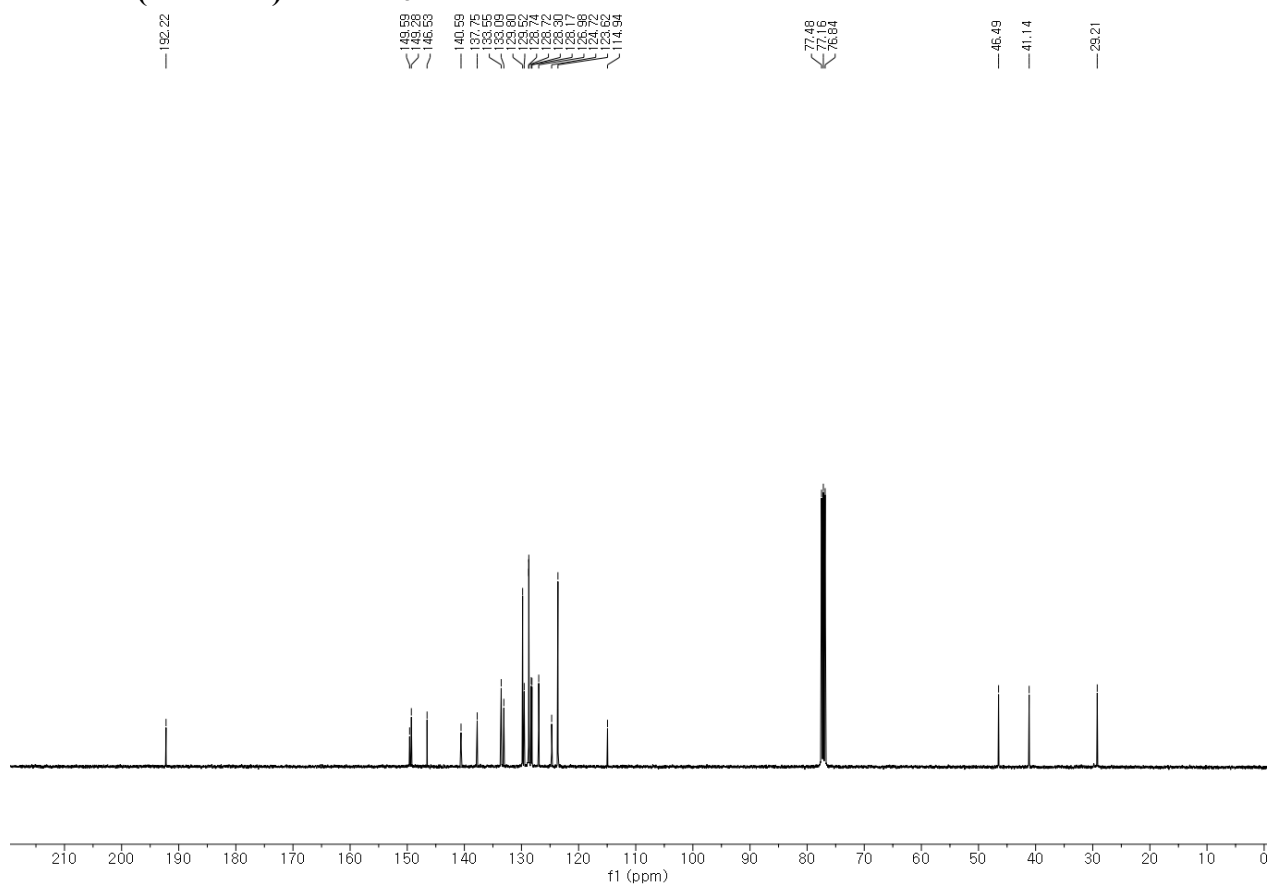

**$^1\text{H}$  NMR (400 MHz) in  $\text{CDCl}_3$** 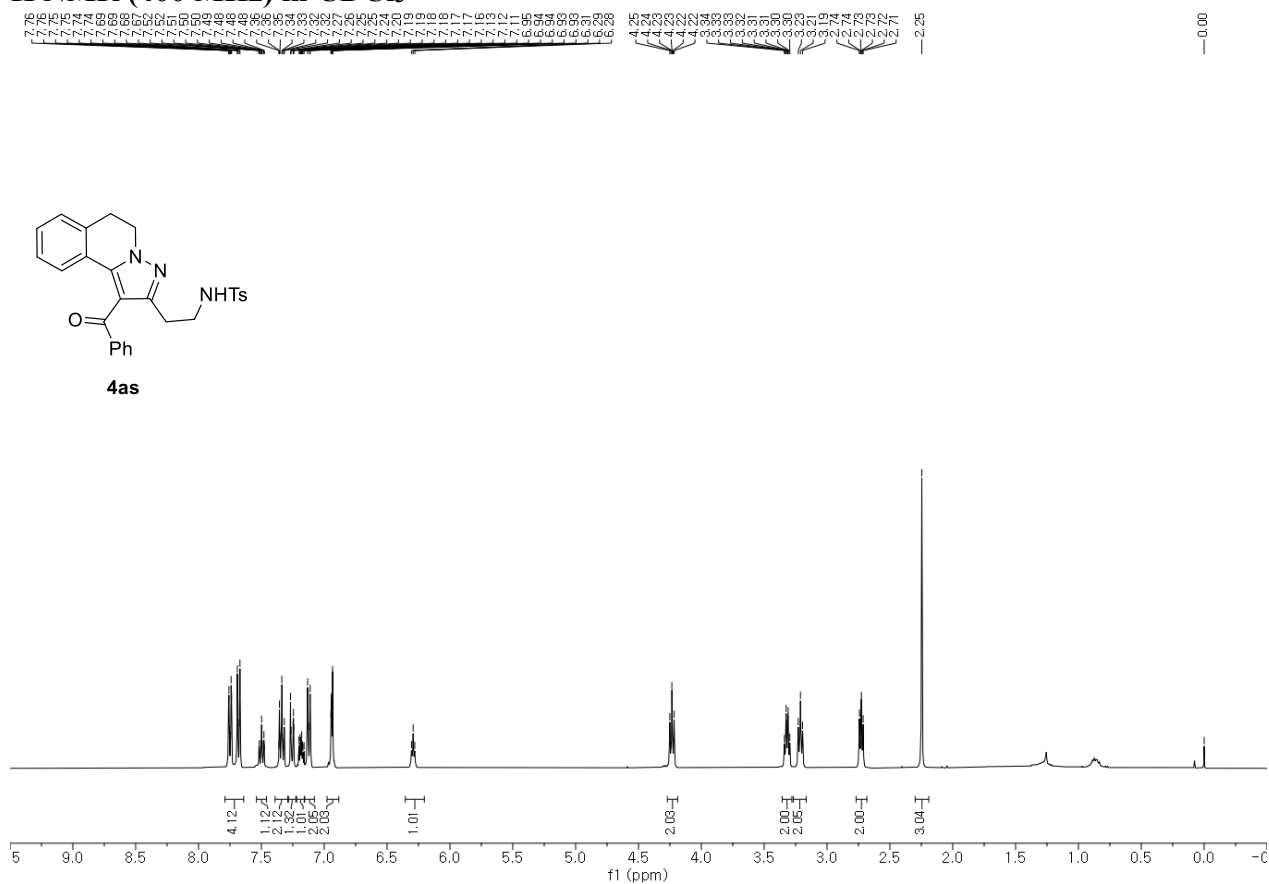 **$^{13}\text{C}$  NMR (100 MHz) in  $\text{CDCl}_3$** 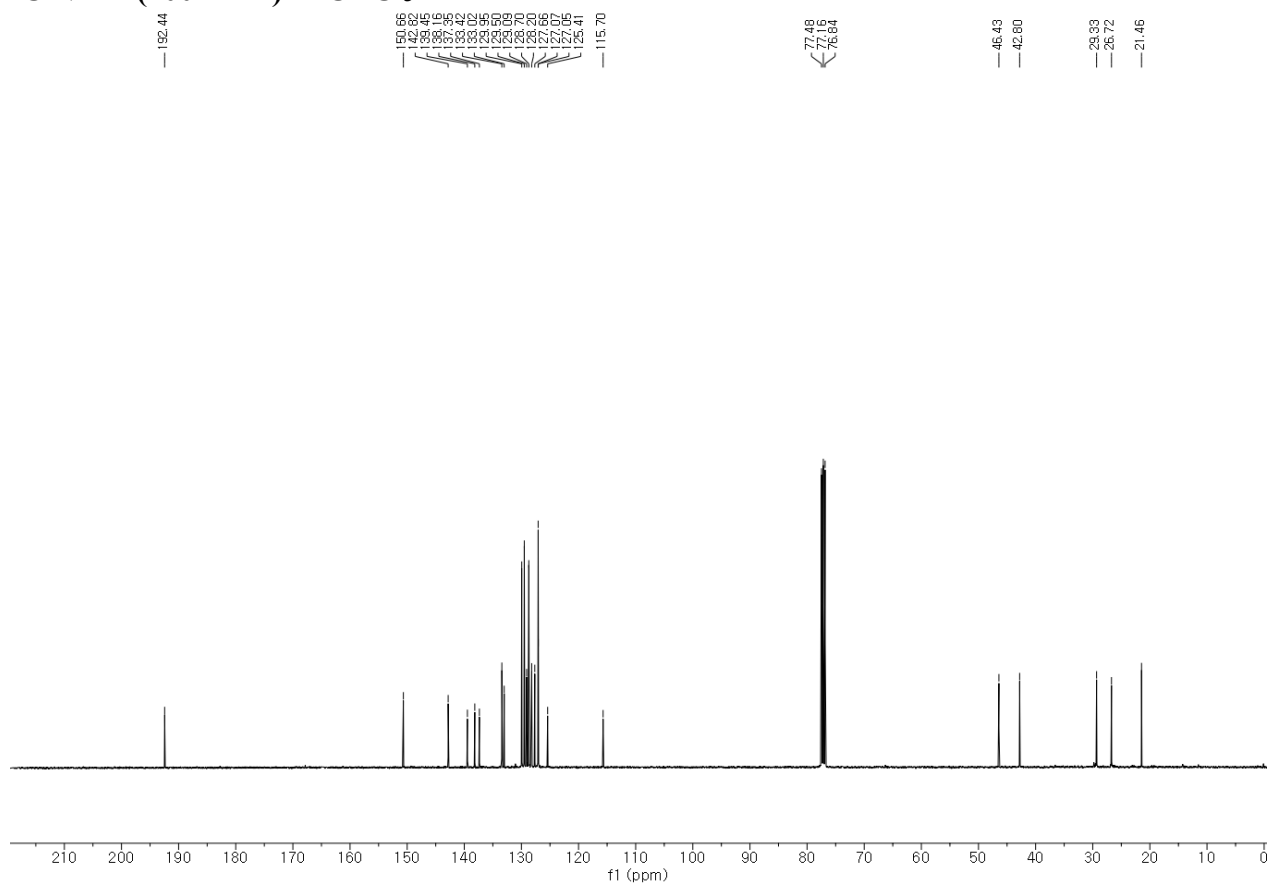

**$^1\text{H}$  NMR (400 MHz) in  $\text{CDCl}_3$** 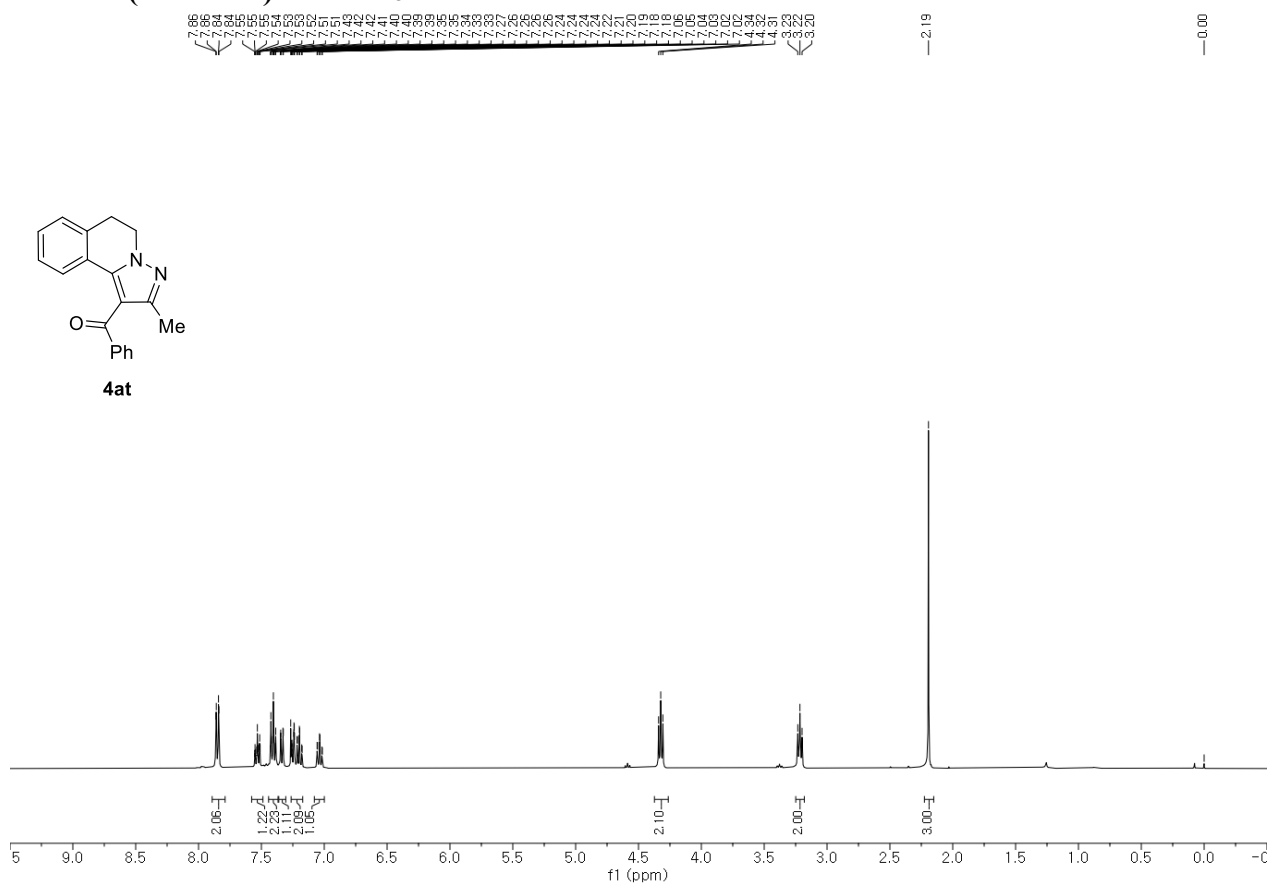 **$^{13}\text{C}$  NMR (100 MHz) in  $\text{CDCl}_3$** 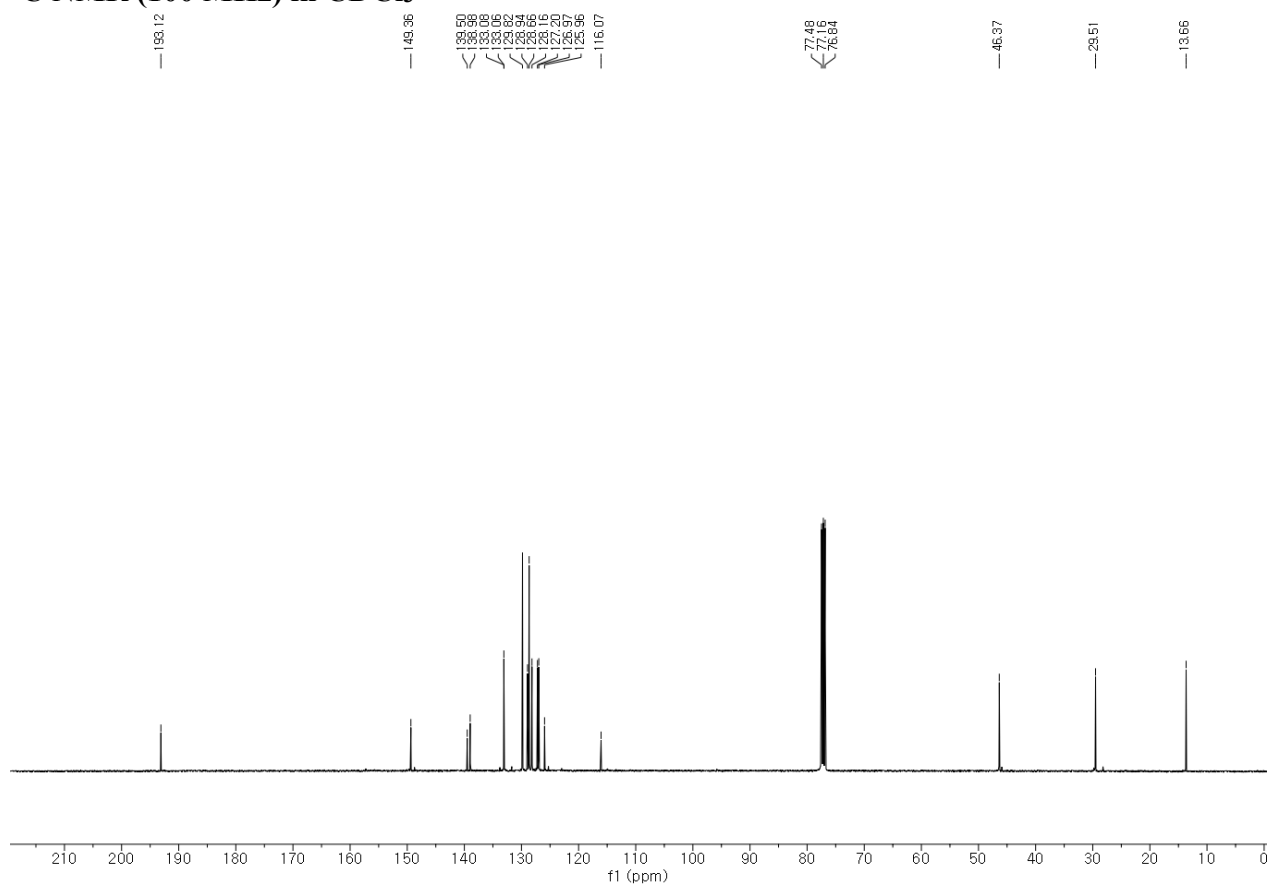

**$^1\text{H}$  NMR (400 MHz) in  $\text{CDCl}_3$** 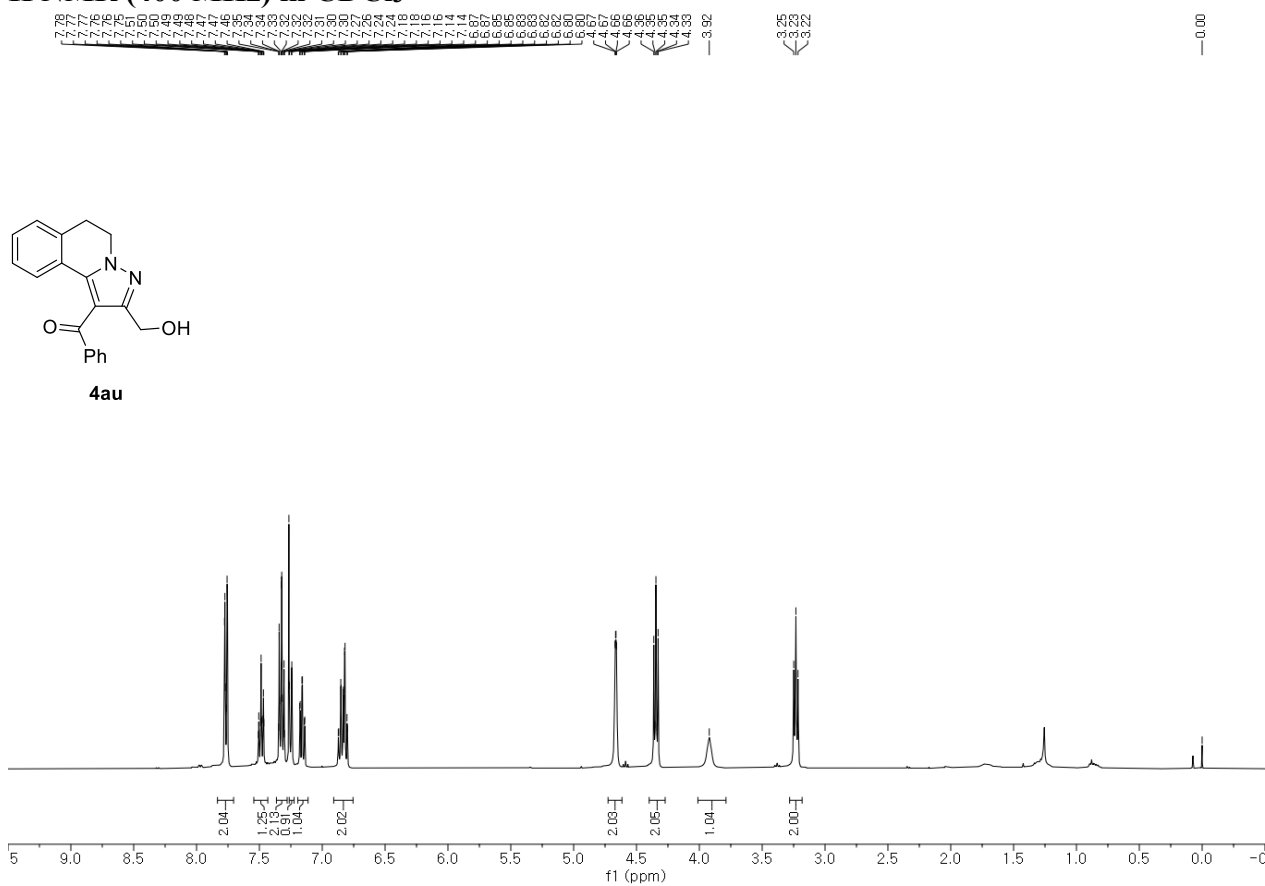 **$^{13}\text{C}$  NMR (100 MHz) in  $\text{CDCl}_3$** 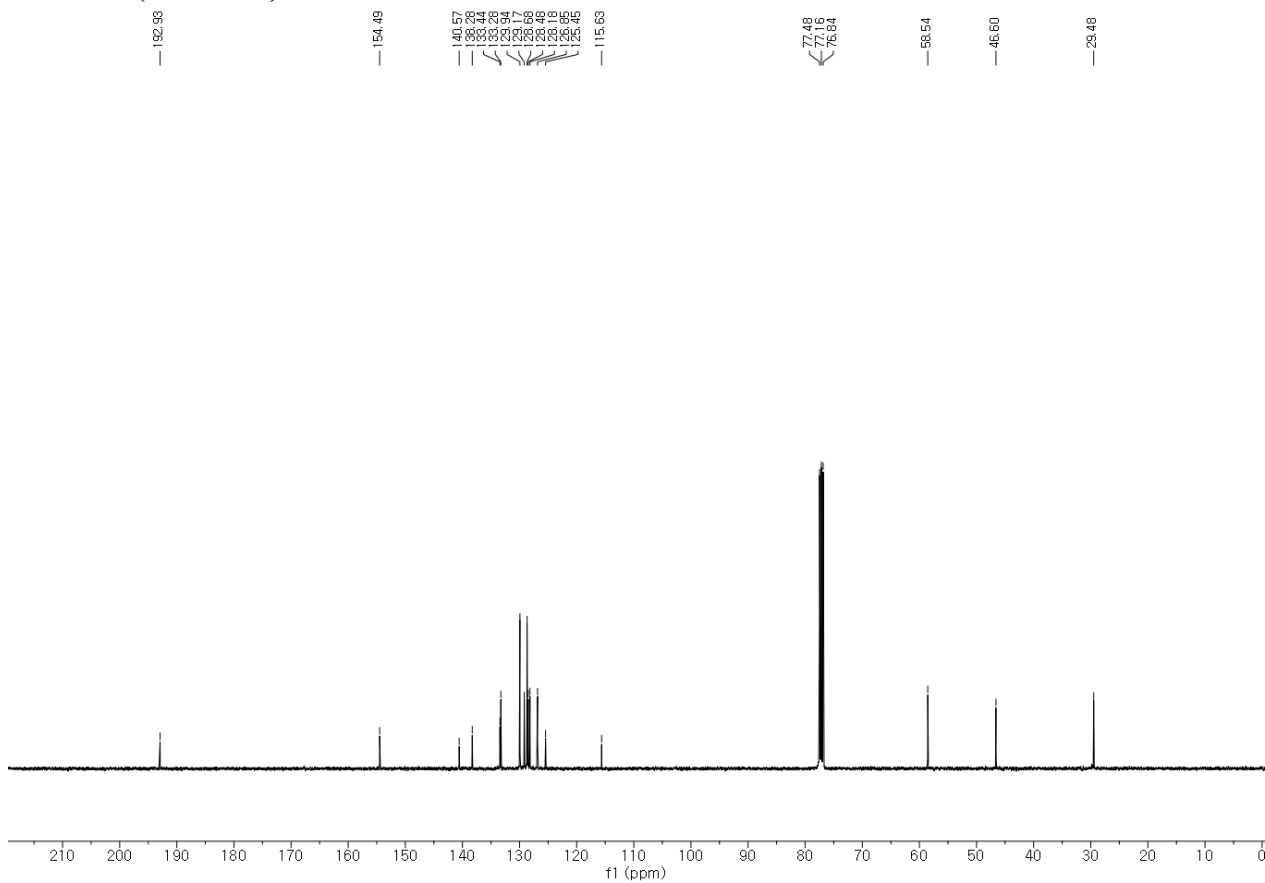

7.70  
7.69  
7.68  
7.67  
7.63  
7.63  
7.63  
7.61  
7.45  
7.44  
7.43  
7.29  
7.27  
7.27  
7.27  
7.25  
7.12  
7.12  
7.11  
7.10  
7.10  
7.10  
7.02  
7.01  
7.01  
7.99  
6.72  
6.72  
6.54  
6.54  
6.52  
6.52  
6.26  
6.23

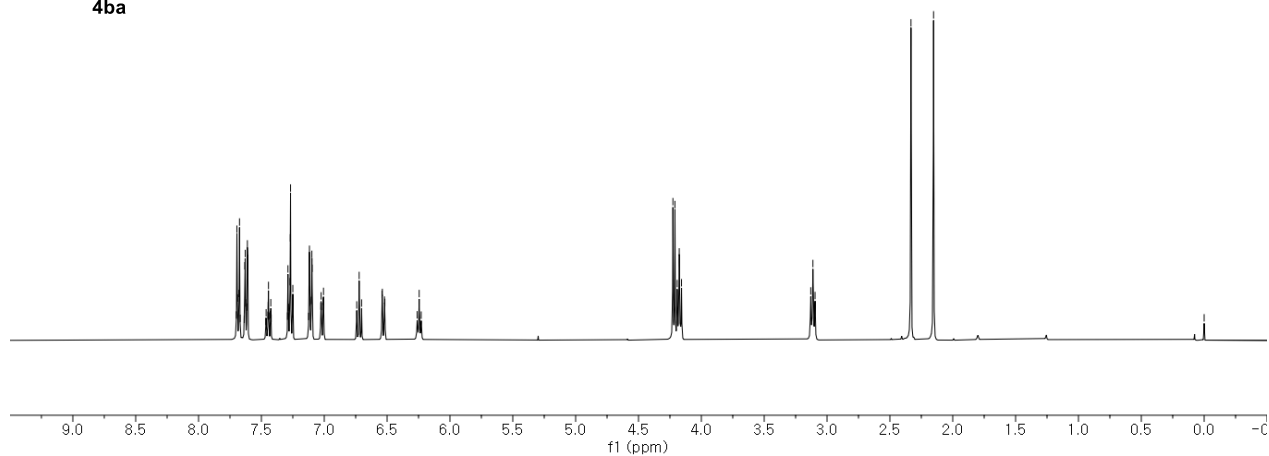

|        |        |       |       |       |
|--------|--------|-------|-------|-------|
| 192.19 | 149.51 | 77.48 | 45.98 | 25.88 |
| 142.84 | 138.12 | 77.71 | 41.09 | 21.86 |
| 138.12 | 135.50 | 76.94 |       | 19.64 |
| 135.50 | 131.04 |       |       |       |
| 131.04 | 128.75 |       |       |       |
| 128.75 | 126.52 |       |       |       |
| 126.52 | 123.97 |       |       |       |
| 123.97 | 120.39 |       |       |       |
| 120.39 | 115.01 |       |       |       |

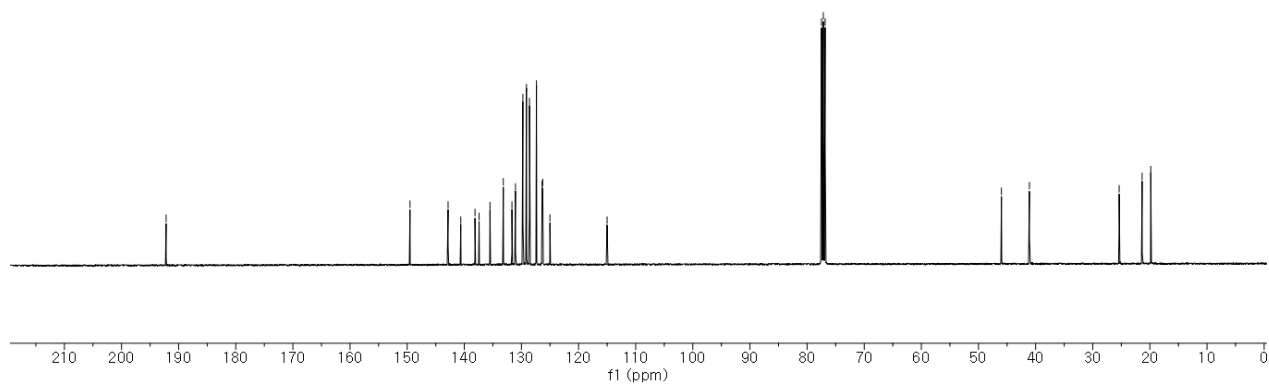



**$^1\text{H}$  NMR (400 MHz) in  $\text{CDCl}_3$** 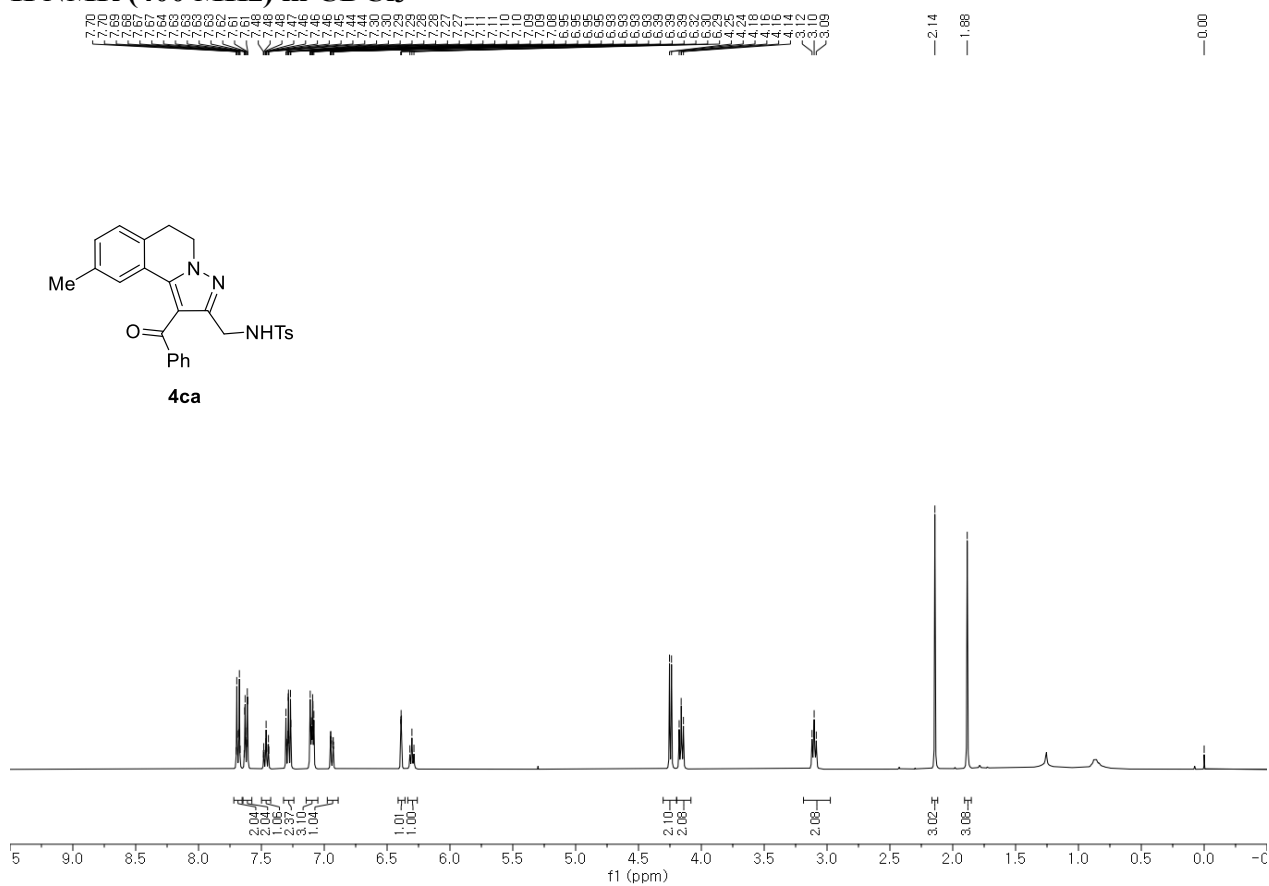 **$^{13}\text{C}$  NMR (100 MHz) in  $\text{CDCl}_3$** 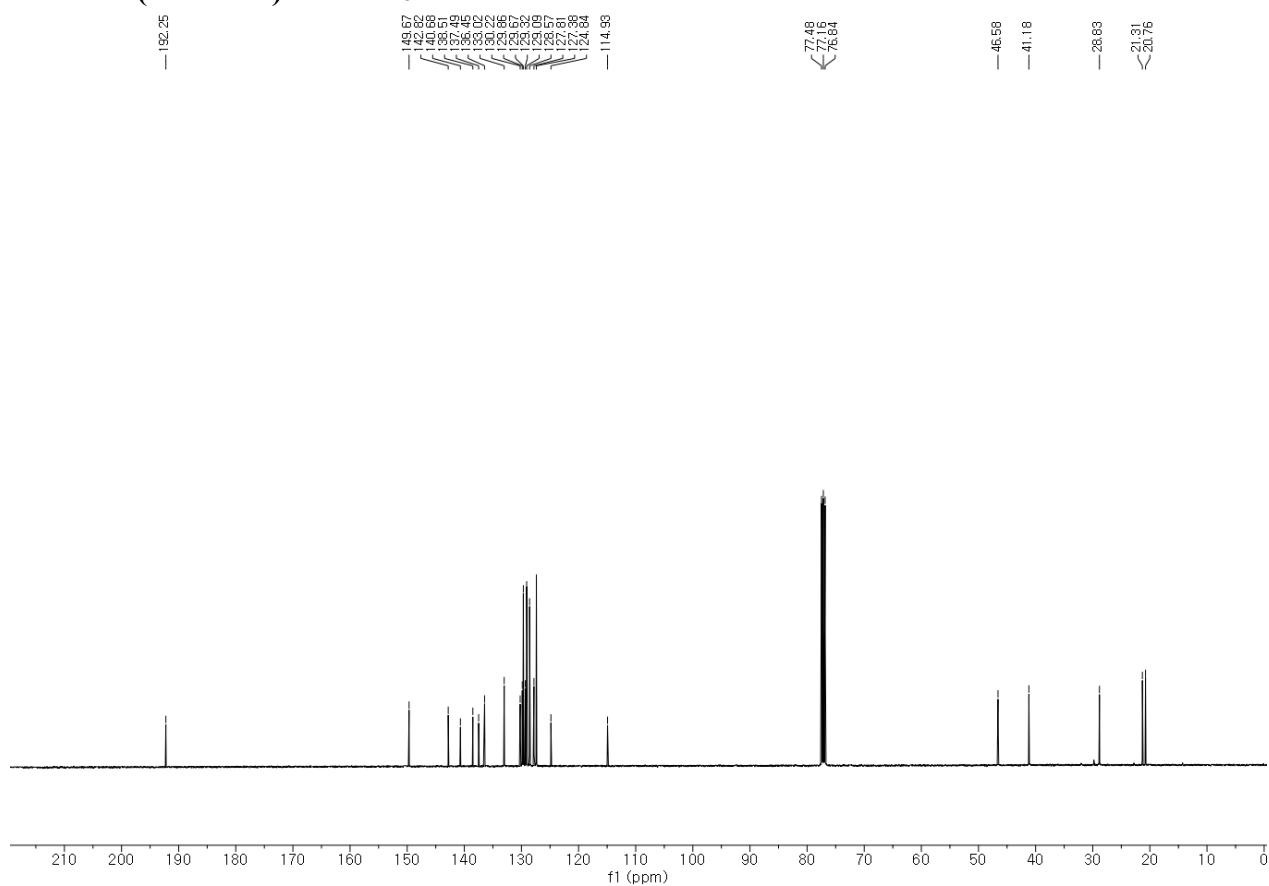

**$^1\text{H}$  NMR (400 MHz) in  $\text{CDCl}_3$** 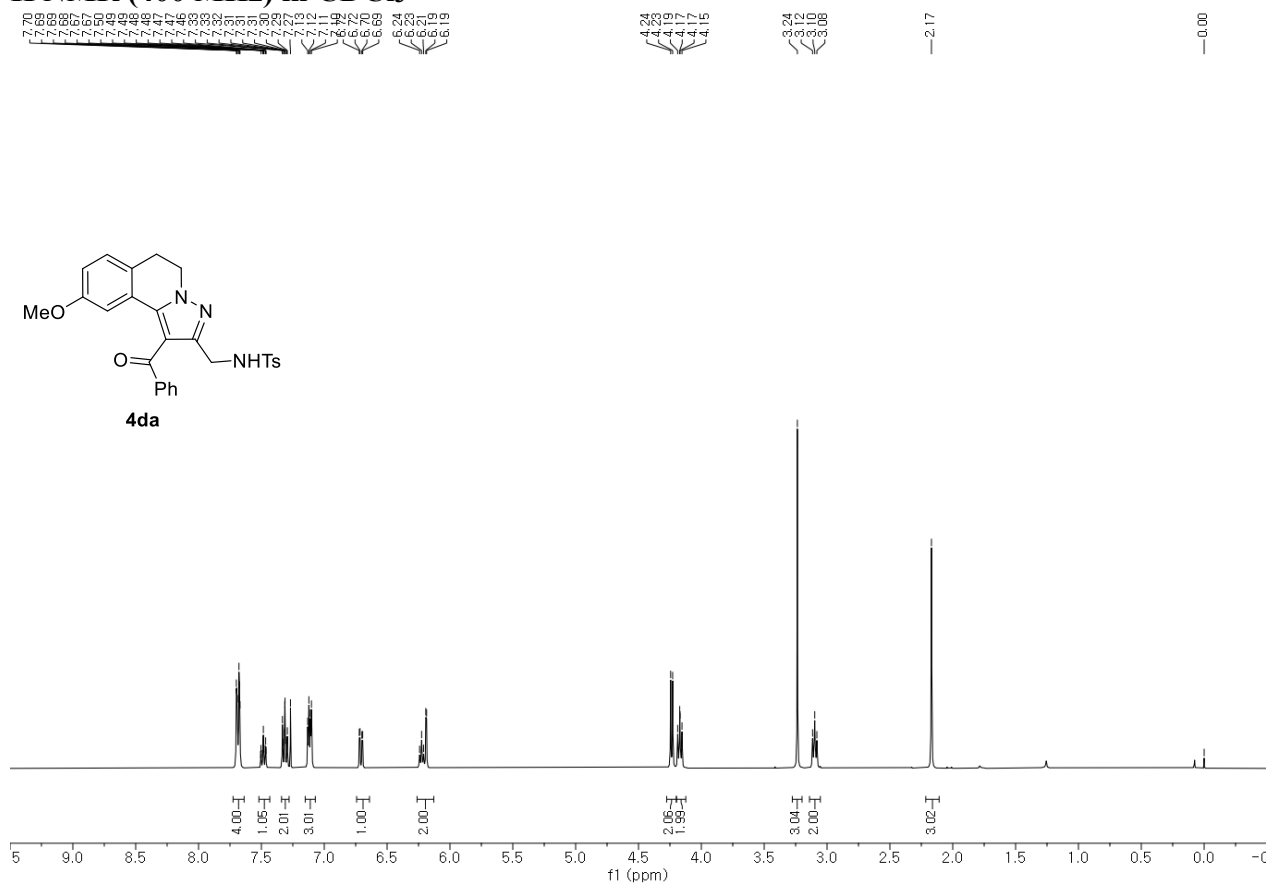 **$^{13}\text{C}$  NMR (100 MHz) in  $\text{CDCl}_3$** 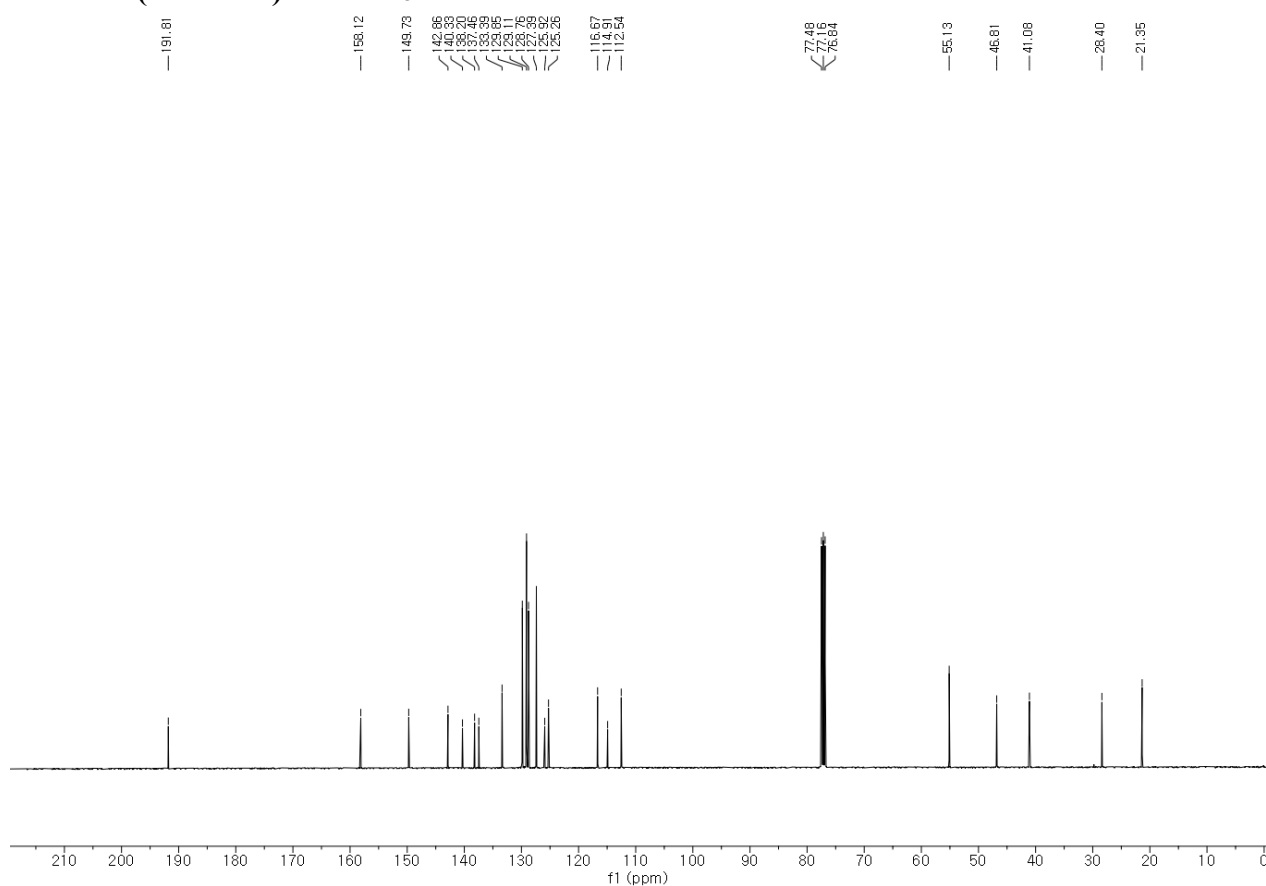

**$^1\text{H}$  NMR (400 MHz) in  $\text{CDCl}_3$** 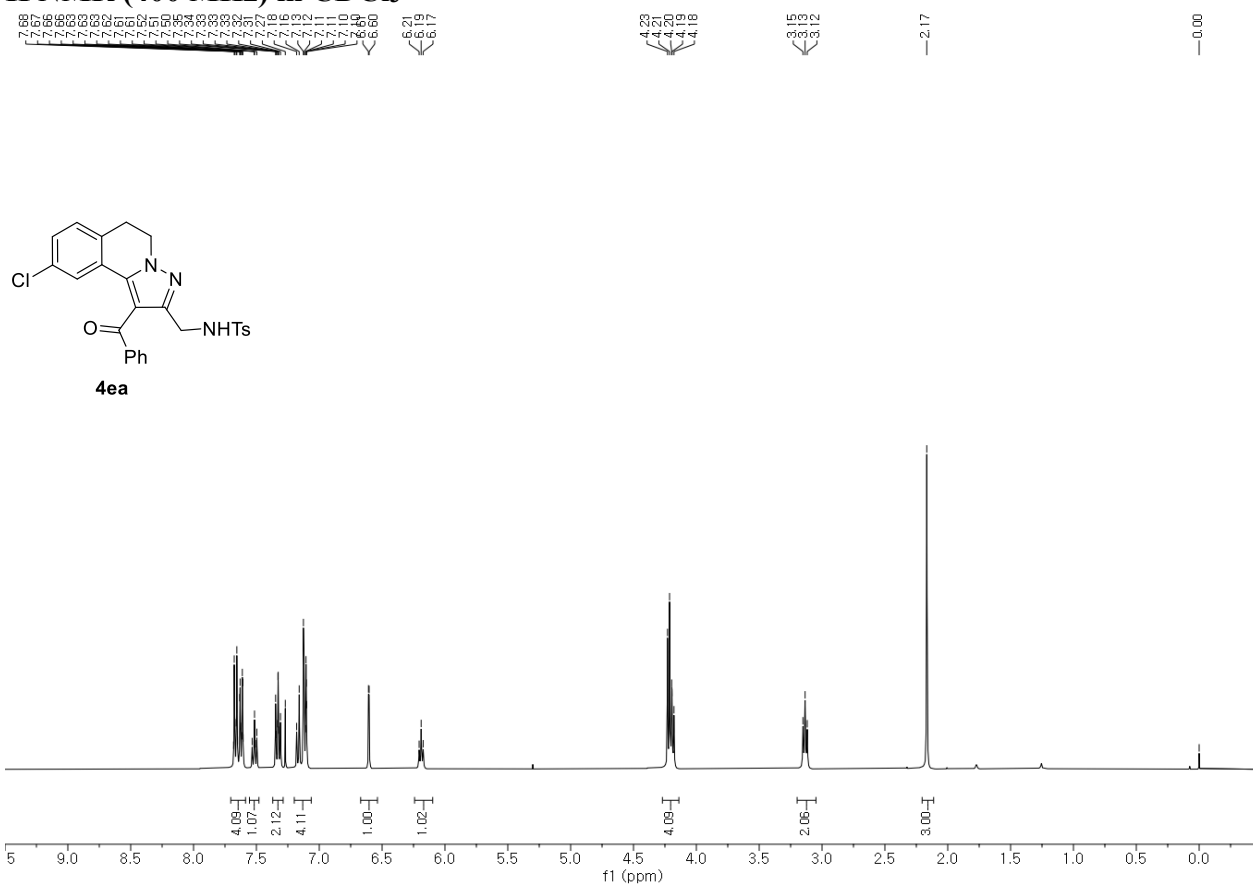 **$^{13}\text{C}$  NMR (100 MHz) in  $\text{CDCl}_3$** 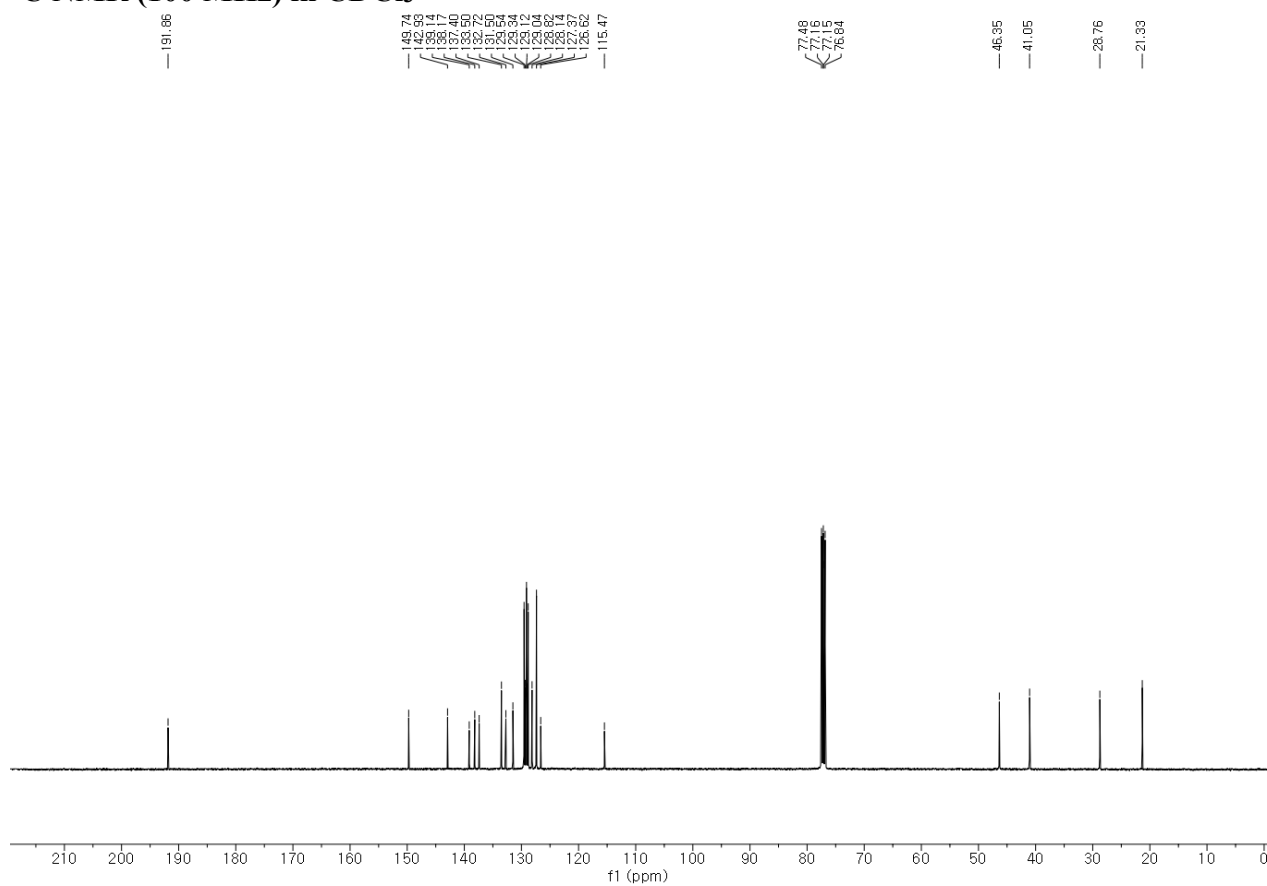

**$^1\text{H}$  NMR (400 MHz) in  $\text{CDCl}_3$** 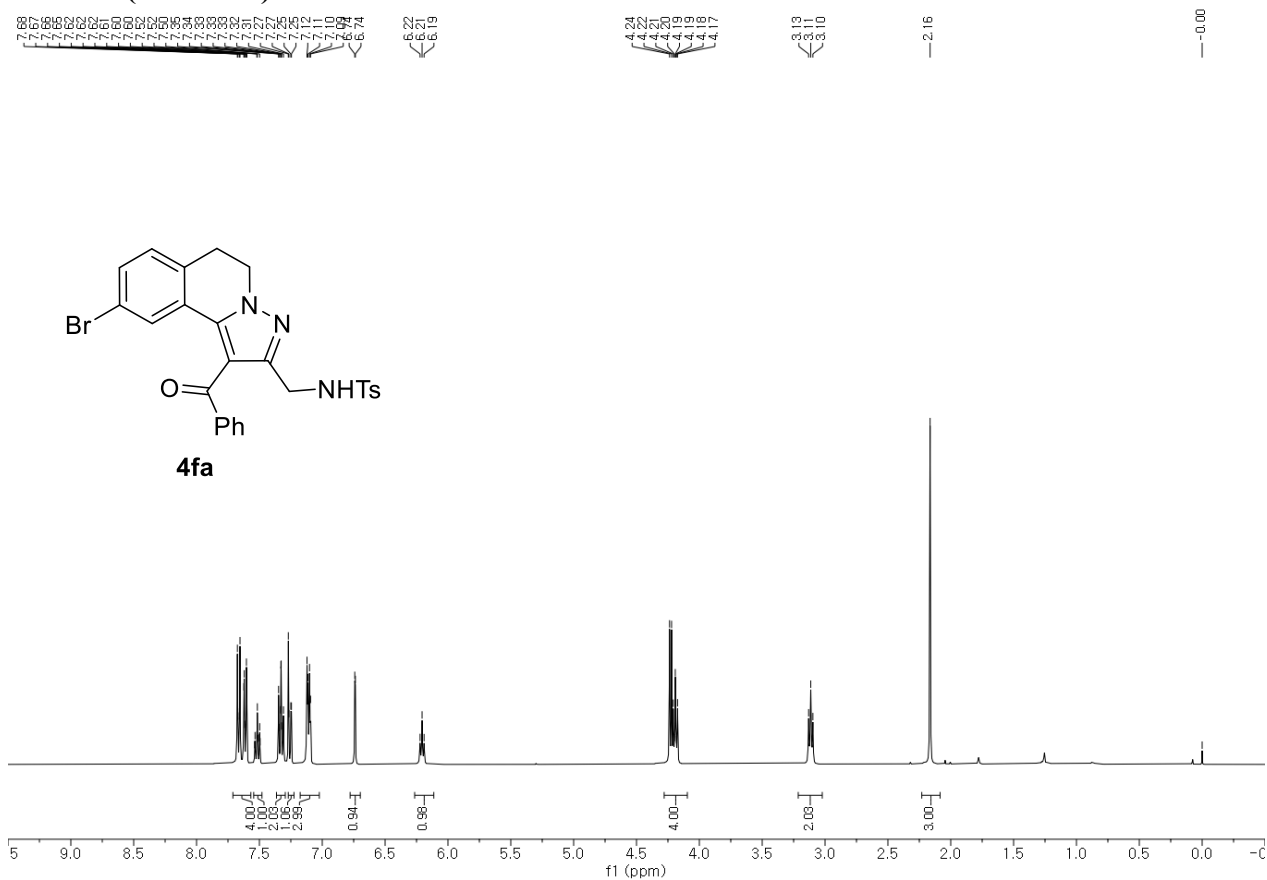 **$^{13}\text{C}$  NMR (100 MHz) in  $\text{CDCl}_3$** 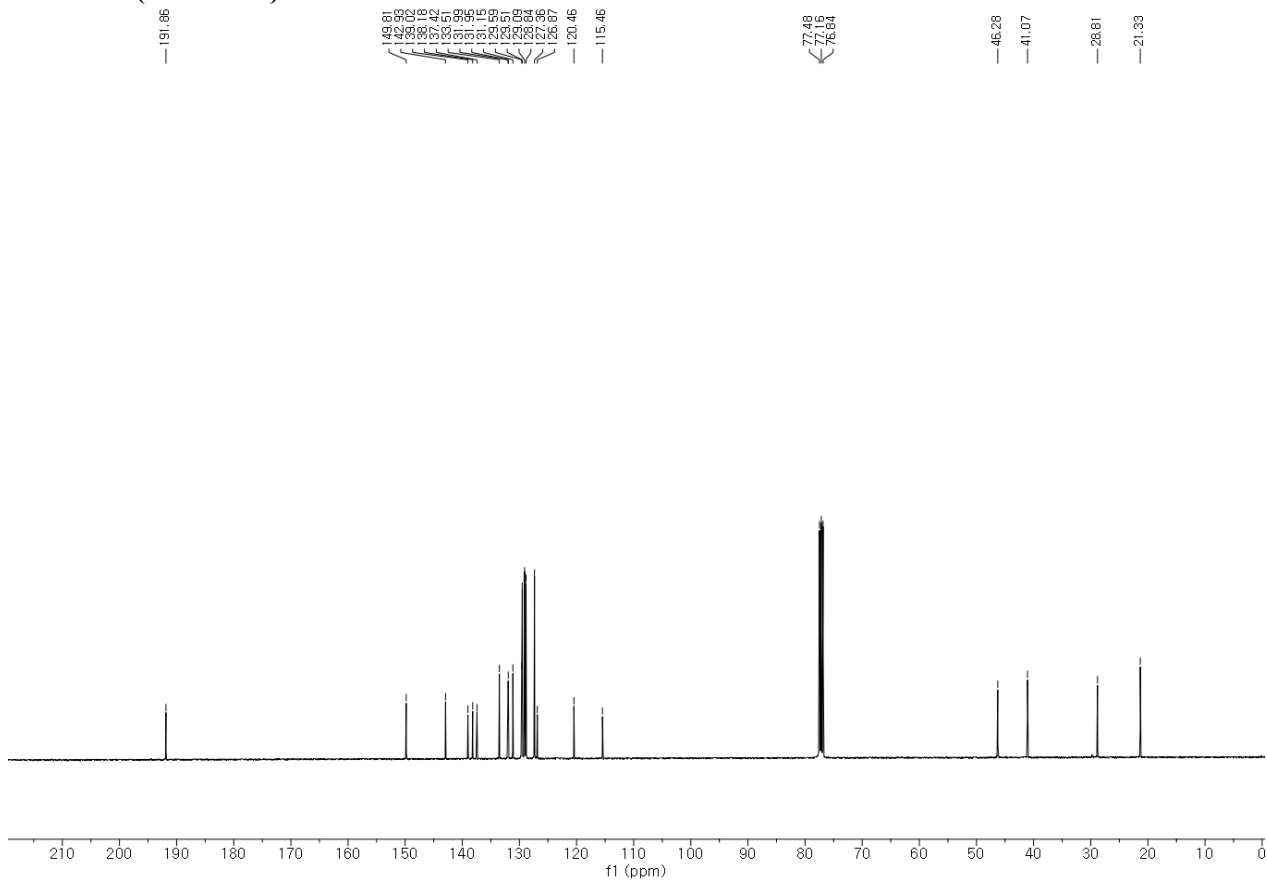

Supplement: s1 [file s1]
